1 **Polyamine-controlled proliferation and protein biosynthesis are independent**  
2 **determinants of hair follicle stem cell fate**

3 Short Title: Polyamine control of stem cell fate

4

5 Kira Allmeroth<sup>1</sup>, Christine S. Kim<sup>1</sup>, Andrea Annibal<sup>1</sup>, Andromachi Pouikli<sup>1</sup>, Carlos  
6 Andrés Chacón-Martínez<sup>1</sup>, Christian Latza<sup>1</sup>, Adam Antebi<sup>1,2</sup>, Peter Tessarz<sup>1,2</sup>, Sara A.  
7 Wickström<sup>1,2,4,5,6</sup> & Martin S. Denzel<sup>1,2,3\*</sup>

8

9 <sup>1</sup>Max Planck Institute for Biology of Ageing, Joseph-Stelzmann-Str. 9b, D-50931  
10 Cologne, Germany

11

12 <sup>2</sup>CECAD - Cluster of Excellence, University of Cologne, Joseph-Stelzmann-Str. 26, D-  
13 50931 Cologne, Germany

14

15 <sup>3</sup>Center for Molecular Medicine Cologne (CMMC), University of Cologne, Robert-Koch-  
16 Str. 21, D-50931 Cologne, Germany

17

18 <sup>4</sup>Helsinki Institute for Life Science, Biomedicum Helsinki, Haartmaninkatu 8, FI-00290  
19 Helsinki, Finland

20

21 <sup>5</sup>Wihuri Research Institute, Biomedicum Helsinki, Haartmaninkatu 8, FI-00290  
22 Helsinki, Finland

23

24 <sup>6</sup>Stem Cells and Metabolism Research Program, Faculty of Medicine, Yliopistonkatu  
25 3, FI-00014 University of Helsinki, Finland

26

27

28 \* Corresponding author: Martin S. Denzel

29 E-Mail: martin.denzel@age.mpg.de

30 phone: +49-(0)221 379 70 443

31 fax: +49-(0)221 379 70 88-443

## 32 **Abstract**

33 Stem cell differentiation is accompanied by an increase in mRNA translation. The rate  
34 of protein biosynthesis is influenced by the polyamines putrescine, spermidine, and  
35 spermine that are essential for cell growth and stem cell maintenance. However, the  
36 role of polyamines as endogenous effectors of stem cell fate and whether they act  
37 through translational control remains obscure. Here, we investigated the function of  
38 polyamines in stem cell fate decisions using hair follicle stem cell (HFSC) organoids.  
39 HFSCs showed lower translation rates than progenitor cells, and a forced suppression  
40 of translation by direct targeting of the ribosome or through specific depletion of natural  
41 polyamines elevated stemness. In addition, we identified N1-acetylspermidine as a  
42 novel parallel regulator of cell fate decisions, increasing proliferation without reducing  
43 translation. Overall, this study delineates the diverse routes of polyamine metabolism-  
44 mediated regulation of stem cell fate decisions.

45

## 46 **Key Points**

- 47 • Low mRNA translation rates characterize hair follicle stem cell (HFSC) state
- 48 • Depletion of natural polyamines enriches HFSCs via reduced translation
- 49 • N1-acetylspermidine promotes HFSC state without reducing translation
- 50 • N1-acetylspermidine expands the stem cell pool through elevated proliferation

51

## 52 **Key Words**

53 Hair follicle stem cells / mRNA translation / polyamines / cell fate

## 54 **Introduction**

55 Translation of messenger RNAs (mRNAs) is one of the most complex and energy-  
56 consuming processes in the cell (Roux & Topisirovic, 2018). It comprises initiation,  
57 elongation, termination, and ribosome recycling and plays a key role in gene  
58 expression regulation (Hershey et al., 2019). The rate of protein synthesis is tightly  
59 controlled by signaling pathways that sense various internal and external stimuli (Roux  
60 & Topisirovic, 2018). Deregulation of translation can manifest in a variety of diseases,  
61 including neurodegeneration and cancer (Tahmasebi et al., 2018b). The regulation of  
62 mRNA translation has also been implicated in early cell fate transitions (Ingolia et al.,  
63 2011, Kristensen et al., 2013, Lu et al., 2009). Several studies in both embryonic and  
64 somatic stem cells demonstrated that global translation is suppressed in stem cells to  
65 retain an undifferentiated state and increased in progenitor cells (Sampath et al., 2008,  
66 Signer et al., 2014, Zismanov et al., 2016).

67 Hair follicle stem cells (HFSCs) represent an excellent paradigm to study adult somatic  
68 stem cell fate decisions, since they fuel cyclical rounds of hair follicle regeneration  
69 during the natural hair cycle (Blanpain & Fuchs, 2009, Fuchs et al., 2001). Interestingly,  
70 Blanco et al. (2016) showed that the activation of HFSCs during the transition from the  
71 resting phase, telogen, to proliferation in anagen during the hair cycle also coincides  
72 with increased translation. These data demonstrate a functional role for increased  
73 translation during differentiation in the epidermis. However, the mechanisms that  
74 regulate translation in stem cells in general and upon differentiation remain poorly  
75 understood.

76 One important determinant of translation rates is the availability of the natural  
77 polyamines putrescine, spermidine, and spermine. These polycations are essential for  
78 cell growth and can bind to a variety of negatively charged cellular molecules, including  
79 nucleic acids (Dever & Ivanov, 2018). Polyamine homeostasis is critical to cell survival

80 and is achieved by coordinated regulation at different levels of their synthesis,  
81 degradation, uptake and excretion (Wallace et al., 2003). Interestingly, up to 15% of  
82 polyamines are stably associated with ribosomes in *Escherichia coli*, highlighting their  
83 importance in protein synthesis (Cohen & Lichtenstein, 1960). Additionally, the  
84 polyamine spermidine is converted to the amino acid hypusine, which post-  
85 translationally modifies the elongation factor eIF5A (Park et al., 1981). This  
86 modification is critical for translation elongation, especially for difficult substrates like  
87 polyproline (Gutierrez et al., 2013, Saini et al., 2009).

88 Given that increased polyamine levels positively regulate translation and that high  
89 translation rates promote stem cell differentiation, it is surprising that previous studies  
90 have implicated elevated polyamine levels in stem cell maintenance. For example,  
91 polyamines positively influence expression of MINDY1, a deubiquitinating enzyme,  
92 which promotes embryonic stem cell (ESC) self-renewal (James et al., 2018).  
93 Additionally, forced overexpression of the rate-limiting enzymes in polyamine  
94 biosynthesis adenosylmethionine decarboxylase (AMD1) or ornithine decarboxylase  
95 (ODC) in ESCs results in delayed differentiation upon removal of LIF and improves  
96 cellular reprogramming (Zhang et al., 2012, Zhao et al., 2012). In line with these  
97 observations, differentiation of human bone marrow-derived mesenchymal stem cells  
98 coincides with decreased polyamine levels (Tsai et al., 2015). Overall, these data  
99 suggest that changes in polyamine levels can affect cell fate. However, the link  
100 between polyamines and translation in cell fate decisions remains unclear. Do low  
101 polyamine levels endogenously reduce translation rates in stem cells? Does reduction  
102 of polyamine levels, and translation, affect stem cell maintenance and function? Might  
103 distinct polyamine species differ in their effects on stem cells through translation or  
104 other mechanisms?

105 To address these questions, we used an *in vitro* organoid HFSC culture system and  
106 investigated polyamines as key regulators of mRNA translation in stem cell fate  
107 decisions. We confirm reduced translation as a key property of HFSCs and  
108 demonstrate that forced reduction of translation promotes the stem cell state. We find  
109 that HFSCs display low levels of natural polyamines, which implicates polyamines as  
110 endogenous gatekeepers of translation in stem cells. Accordingly, specific depletion of  
111 natural polyamines using the polyamine analogue N1,N11-diethylnorspermine  
112 (DENSpm) improved stem cell maintenance through reduced translation. Surprisingly,  
113 depletion of all polyamines by difluoromethylornithine (DFMO) does not affect cell fate.  
114 Therefore, we hypothesized that the polyamine pathway can also modulate cell fate  
115 independently of reduced translation. Intriguingly, we identify a new function for N1-  
116 acetylspermidine (N1-AcSpd) in promoting proliferation, expanding the stem cell pool.  
117 Taken together, our data demonstrate that polyamines play a central role in stem cell  
118 fate decisions by controlling the key processes translation and proliferation to ensure  
119 stem cell maintenance and tissue homeostasis.

120 **Results**

121 **Low translation rates mark the HFSC state and decreasing translation enhances**

122 **stemness in the 3D-3C organoids.**

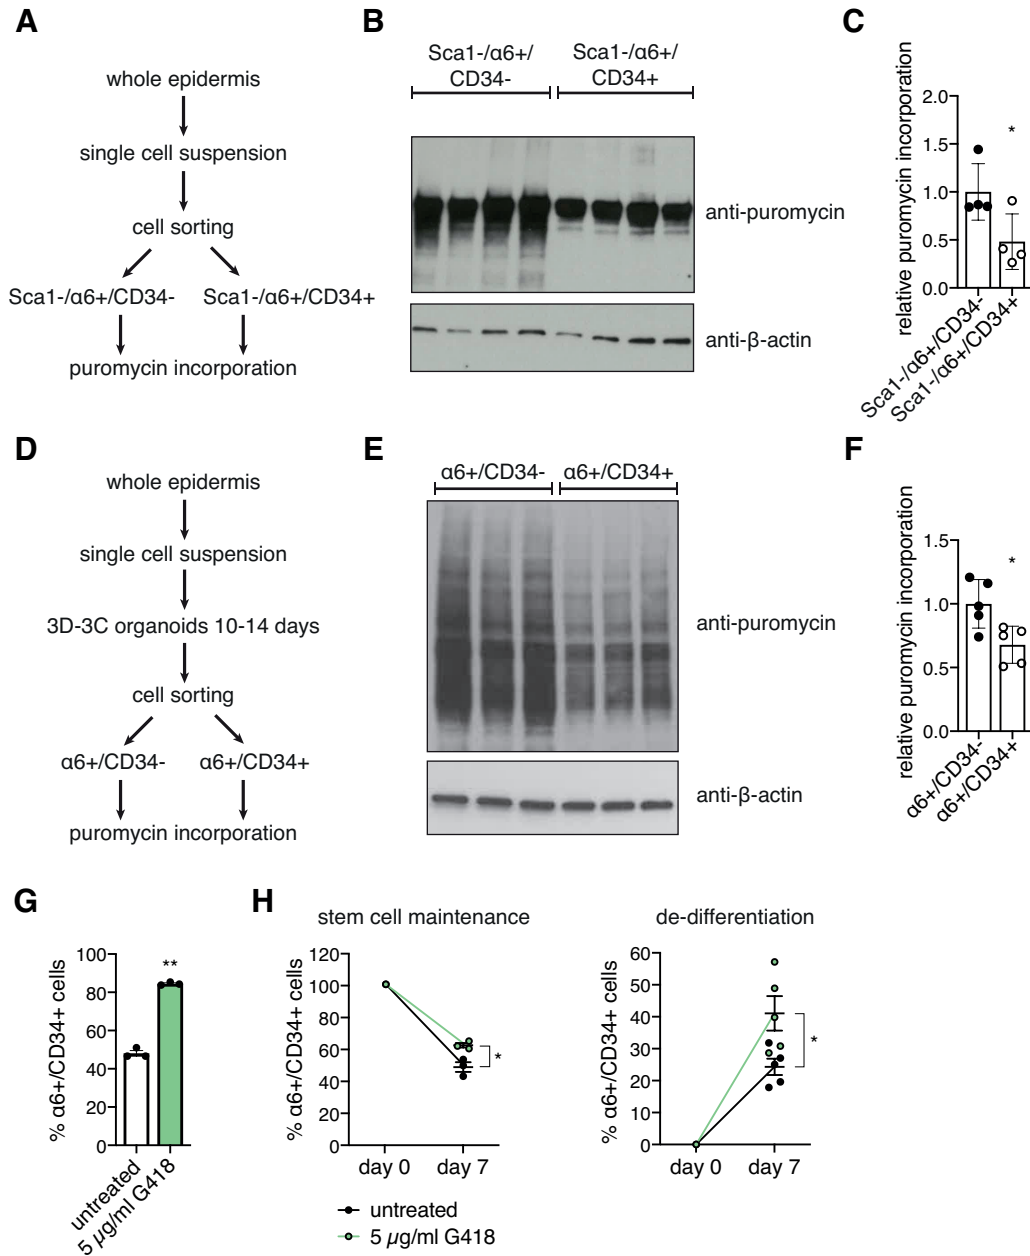

123

124 **Figure 1: Low translation rates mark the HFSC state and decreasing translation enhances**  
 125 **stemness in the 3D-3C organoids.** (A) Schematic representation of the workflow for puromycin  
 126 incorporation using freshly isolated cells. (B) Western blot analysis after puromycin incorporation in  
 127 Sca1-/α6+/CD34- progenitor cells compared to Sca1-/α6+/CD34+ hair follicle stem cells (HFSCs). (C)  
 128 Quantification of the Western blot in (B). Mean ± SD (n=4); \* p<0.05 (t test). (D) Schematic  
 129 representation of the workflow for puromycin incorporation using 3D-3C cultured cells. (E)  
 130 Representative Western blot analysis after puromycin incorporation in α6+/CD34- progenitor cells  
 131 compared to α6+/CD34+ HFSCs. (F) Quantification of the Western blot in (E). Mean ± SD (n=5);  
 132 \* p<0.05 (t test). (G) Ratio of α6+/CD34+ cells after two weeks of 3D-3C culture with or without G418  
 133 treatment. Mean ± SEM (n=3); \*\* p<0.01 (t test). (H) Ratio of α6+/CD34+ cells at day 0 and day 7 post-

134 sorting starting from 100 %  $\alpha 6+$ /CD34+ cells (left) or 100 %  $\alpha 6+$ /CD34- cells (right) with or without G418  
135 treatment. Mean  $\pm$  SEM ( $n \geq 3$ ); \*  $p < 0.05$  (t test).

136 It has been previously described that stem cells display lower translation rates than  
137 their differentiated counterparts (Tahmasebi et al., 2018a). To test if this was also true  
138 in epidermal stem cells, we sorted freshly isolated mouse epidermal cells using three  
139 different markers (Fig. 1A):  $\alpha 6$  integrin is expressed in all progenitors both in the  
140 interfollicular epidermis (IFE) and the hair follicle (HF) (Li et al., 1998, Sonnenberg et  
141 al., 1991); the hematopoietic stem cell marker CD34 marks the bulge stem cells of the  
142 HF (Trempe et al., 2003); stem cell antigen-1 (Sca1) expression can be detected in  
143 the infundibulum (IFD) region of the HF and the basal layer of the epidermis (Jensen  
144 et al., 2008). By gating for Sca1 negative cells, IFE and IFD progenitors can be  
145 separated from HF progenitors. Thus, we compared HF bulge stem cells (Sca1-  
146 / $\alpha 6+$ /CD34+) to HF outer root sheath cells (Sca1-/ $\alpha 6+$ /CD34-). We performed  
147 puromycin incorporation to quantify the amount of newly synthesized proteins (Schmidt  
148 et al., 2009). Western blot analysis revealed a significant reduction of puromycin  
149 incorporation in Sca1-/ $\alpha 6+$ /CD34+ stem cells (Fig. 1B-C), confirming reduced  
150 translation rates in HFSCs *in vivo*.

151 To understand the mechanisms and functional consequences of this difference in  
152 translation, we made use of an *ex vivo* organoid culture system (3D-3C culture)  
153 established by Chacon-Martinez et al. (2017) allowing for the long-term culture and  
154 manipulation of HFSCs and their direct progeny. Importantly, in this culture cells  
155 maintain self-renewal capacity and multipotency and respond to the same signals as  
156 they do *in vivo*. In the 3D-3C organoids, a balance between  $\alpha 6+$ /CD34+ HFSCs and  
157  $\alpha 6+$ /CD34- progenitor cells is formed in a self-driven process. Based on their  
158 transcriptome and marker expression analysis, these progenitor cells represent HF  
159 outer root sheath (ORS) cells and inner bulge cells (Kim et al., 2019), both of which

160 represent HFSC progeny and act as niche cells for HFSCs *in vivo* (Hsu et al., 2014).  
161 To confirm cell identity of  $\alpha6+/CD34+$  HFSCs and  $\alpha6+/CD34-$  ORS progenitors, we  
162 sorted cells after two weeks of 3D-3C culture and analyzed gene expression by RNA-  
163 sequencing. Comparing the two populations, the most enriched GO term was skin  
164 development (Fig. S1A). As expected, the differentiation markers Krt1 and Krt10 were  
165 enriched in progenitor cells, while the expression of the stem cell marker genes *Id2*,  
166 *Lhx2*, and *Sox9* was higher in HFSCs (Fig. S1B). Thus,  $\alpha6+/CD34-$  progenitors and  
167  $\alpha6+/CD34+$  HFSCs are clearly distinguishable at the gene expression level and  
168 represent distinct cellular states. Next, we investigated puromycin incorporation in the  
169 two cell populations after sorting and found reduced translation in  $\alpha6+/CD34+$  HFSCs  
170 (Fig. 1D-F). Thus, the 3D-3C organoids maintain this key *in vivo* property of HFSCs,  
171 making them a suitable model to study the influence of translation on cell fate.  
172 Next, we asked whether reduced translation might drive cell fate decisions in HFSCs.  
173 To this end, we manipulated translation in the 3D-3C organoids by addition of low  
174 doses of G418, a well described inhibitor of translation elongation (Bar-Nun et al.,  
175 1983). We confirmed reduced translation after 4 h of G418 treatment in the 3D-3C  
176 organoids by measuring puromycin incorporation (Fig. S1C-D). Strikingly, a forced  
177 decrease in translation resulted in a significant increase of  $\alpha6+/CD34+$  stem cells after  
178 two weeks of 3D-3C culture (Fig. 1G). To understand whether this increase had a  
179 functional consequence, we analyzed stem cell potency in a colony formation assay.  
180 For this, cells were seeded in clonal density on a feeder layer and cultured for 2 to 3  
181 weeks (Fig. S1E). Quantification of total colony number revealed a significant increase  
182 upon G418 treatment in the organoid culture, indicating that inhibiting translation  
183 increased stem cell proliferative potential (Fig. S1F-G). The self-organizing plasticity  
184 of the organoids results in a balance between  $\alpha6+/CD34-$  and  $\alpha6+/CD34+$  cells



185 (Chacon-Martinez et al., 2017). This balance is influenced by self-renewal and  
186 differentiation of HFSCs but also by proliferation and de-differentiation of progenitors  
187 back to the stem cell state. Thus, to investigate if the increase in stem cell potency was  
188 accompanied by increased self-renewal and de-differentiation in the G418-treated  
189 organoids, we sorted the cells after two weeks of 3D-3C culture to generate pure  
190 populations of either  $\alpha 6^{+}/CD34^{-}$  or  $\alpha 6^{+}/CD34^{+}$  cells. These pure populations were  
191 cultured for one week with or without G418 treatment before analysis. Interestingly,  
192 G418 treatment prevented stem cell differentiation and promoted de-differentiation of  
193 progenitors back to the stem cell state (Fig. 1H). Taken together, these data suggest  
194 that reduced translation is not merely a consequence of stemness. Instead, decreasing  
195 translation actively promotes the stem cell state.

196

197 **Depletion of natural polyamines is a feature of stem cells and can drive**  
198 **stemness *in vitro*.**

199 To further analyze the effect of decreased translation rates on cell fate, we focused on  
200 the polyamine pathway (Fig. 2A). Reduction of the natural polyamines putrescine,  
201 spermidine, and spermine has been implicated in reduced translation (Dever & Ivanov,  
202 2018, Pegg, 2016). We thus asked whether stem cells might display lower polyamine  
203 levels compared to their differentiated counterparts. Indeed, when we sorted cells after  
204 two weeks of 3D-3C culture and measured polyamines by LC-MS, we found reduced  
205 levels of putrescine, spermidine, and spermine in  $\alpha 6^{+}/CD34^{+}$  HFSCs compared to  
206  $\alpha 6^{+}/CD34^{-}$  progenitors (Fig. 2B).

207 To probe polyamine function in stem cell fate decisions, we manipulated their levels  
208 using the spermine analogue N1,N11-diethylnorspermine (DENSpm), which increases  
209 spermidine/spermine N1-acetyltransferase (SSAT) expression (Coleman et al., 1995,  
210 Fogel-Petrovic et al., 1996, Parry et al., 1995). During polyamine catabolism, SSAT

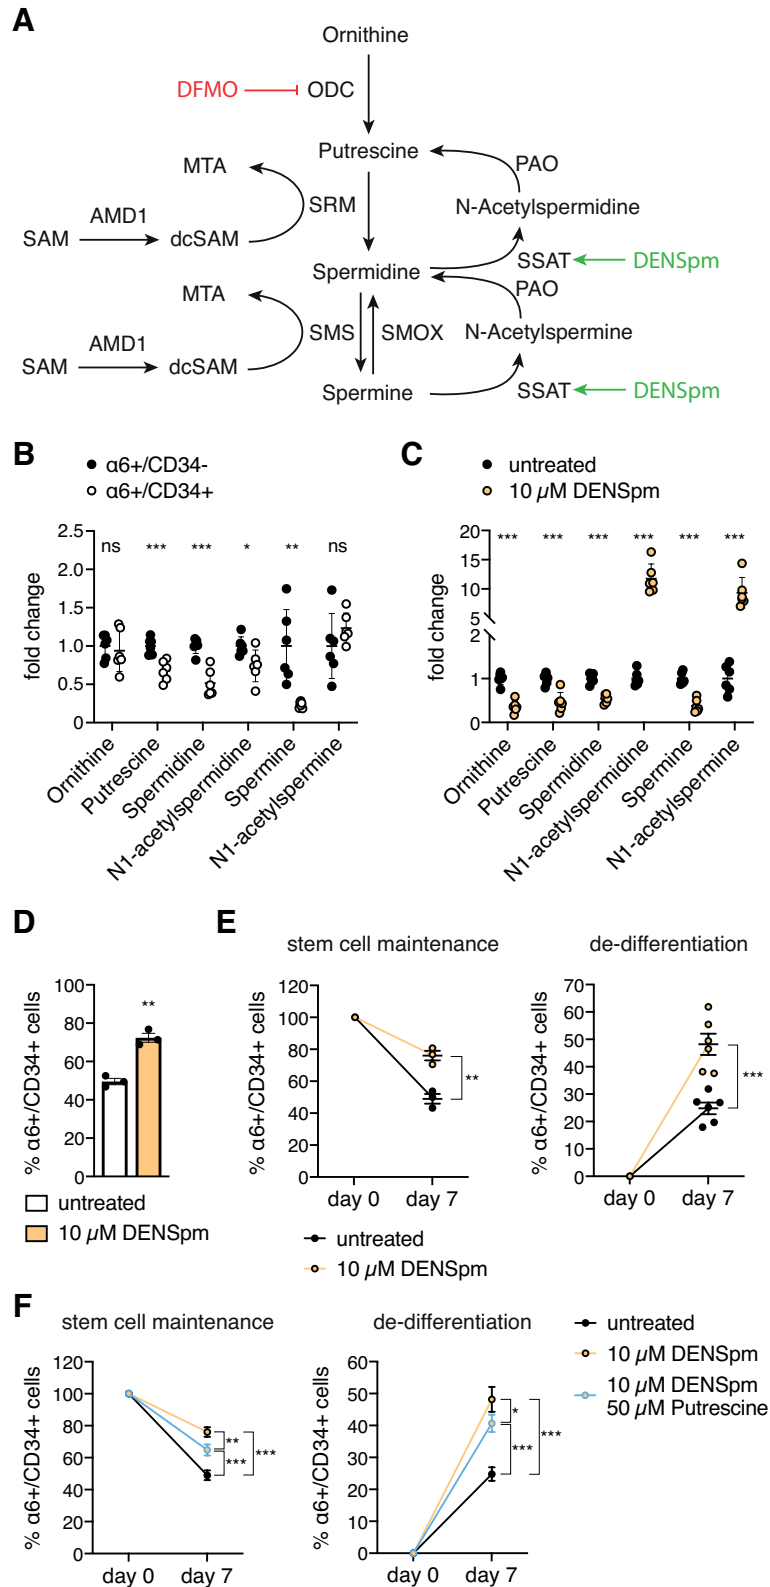

211

212 **Figure 2: Reduction of translation by depletion of natural polyamines recapitulates the stem cell**  
 213 **state and regulates cell fate decisions.** (A) Schematic representation of the polyamine pathway.  
 214 DENSpm is marked in green and DFMO is depicted in red. (B) Polyamine levels in sorted  $\alpha 6+/CD34-$   
 215 and  $\alpha 6+/CD34+$  cells after 3D-3C culture. Mean  $\pm$  SEM (n=6). (C) Polyamine levels in 3D-3C cultured  
 216 cells with and without DENSpm treatment. Mean  $\pm$  SEM (n=6). (D) Ratio of  $\alpha 6+/CD34+$  cells after two  
 217 weeks of 3D-3C culture with or without DENSpm treatment. Mean  $\pm$  SEM (n=3). (E) Ratio of  $\alpha 6+/CD34+$   
 218 cells at day 0 and day 7 post-sorting starting from 100 %  $\alpha 6+/CD34+$  cells (left) or 100 %  $\alpha 6+/CD34-$   
 219 cells (right) with or without DENSpm treatment. Mean  $\pm$  SEM (n $\geq$ 3). (B-E) Statistical significance was

220 calculated by t test. \*\*\* p<0.001, \*\* p<0.01, \* p<0.05, ns: not significant. (F) Ratio of  $\alpha 6+$ /CD34+ cells at  
221 day 0 and day 7 post-sorting starting from 100 %  $\alpha 6+$ /CD34+ cells (left) or 100 %  $\alpha 6+$ /CD34- cells (right)  
222 with or without DENSpM or additional putrescine treatment. Mean  $\pm$  SEM (n $\geq$ 3). Two-way ANOVA  
223 Dunnett post-test. \*\*\* p<0.001, \*\* p<0.01, \* p<0.05.

224 acetylates spermidine and spermine using acetyl-CoA to form N1-acetylspermidine  
225 and N1-acetylspermine, respectively (Fig. 2A). Thus, DENSpM depletes natural  
226 polyamines, while the acetylated forms accumulate (Uimari et al., 2009), resulting in  
227 decreased mRNA translation (Landau et al., 2010). LC-MS analysis confirmed reduced  
228 natural polyamines and elevated acetylated forms upon DENSpM treatment in the 3D-  
229 3C organoids (Fig. 2C). Strikingly, supplementation with DENSpM resulted in a  
230 significant increase in  $\alpha 6+$ /CD34+ stem cells after two weeks of 3D-3C culture  
231 (Fig. 2D). The increase in stemness was confirmed in the colony formation assay that  
232 revealed an elevated colony number upon DENSpM treatment in the 3D-3C organoids,  
233 suggesting increased proliferative potential (Fig. S2A-B). To investigate stem cell  
234 maintenance and de-differentiation separately, pure populations were sorted and  
235 cultured for one week with or without DENSpM treatment. Both mechanisms were  
236 affected by the depletion of natural polyamines, increasing  $\alpha 6+$ /CD34+ stem cells  
237 (Fig. 2E). To rule out that the changes in stem cell number and proliferative potential  
238 were secondary to an effect on cell proliferation, we measured EdU incorporation in  
239 both  $\alpha 6+$ /CD34+ and  $\alpha 6+$ /CD34- cells. EdU incorporation was not affected by  
240 DENSpM treatment in either of the cell populations (Fig. S2C). Additionally, we  
241 analyzed apoptosis by annexin V staining. While annexin V staining was not changed  
242 in  $\alpha 6+$ /CD34+ cells, DENSpM treatment slightly increased apoptosis in  $\alpha 6+$ /CD34-  
243 progenitors (Fig. S2D). However, this effect was not strong enough to account for the  
244 increase in  $\alpha 6+$ /CD34+ HFSCs in treated organoid cultures. Furthermore, we  
245 demonstrated increased stem cell potency in the colony-forming assay (Fig. S2A-B).  
246 Thus, our data indicate that the promotion of the stem cell state by DENSpM was

247 through a direct effect on stem cell fate. Since the effect of DENSpm supplementation  
248 on the pure stem cell population was comparable to G418 treatment (Fig. 1H), we  
249 speculated that reduced translation might be the underlying mechanism of increased  
250 stemness. To test this hypothesis, we supplemented DENSpm treated cells with  
251 putrescine to elevate the natural polyamines. Indeed, this double treatment showed a  
252 partial rescue as stem cell maintenance and de-differentiation were significantly  
253 suppressed (Fig. 2F). Taken together, these data demonstrate that  $\alpha 6^{+}/CD34^{+}$  stem  
254 cells have lower polyamine levels, and that the reduction of natural polyamines  
255 influences HFSC fate through decreased translation.

256

257 **N1-acetylspermidine is a novel determinant of HFSC fate acting independently**  
258 **of reduced translation.**

259 To further test if reduction of translation by depletion of natural polyamines caused the  
260 observed cell fate changes upon DENSpm treatment, we made use of  
261 difluoromethylornithine (DFMO), an irreversible ODC inhibitor (Metcalf et al., 1978)  
262 (Fig. 2A) that depletes all polyamines. In contrast to ODC inhibition by DFMO,  
263 DENSpm supplementation caused specific reduction of the natural polyamines  
264 putrescine, spermidine, and spermine, while the acetylated forms accumulated  
265 (Fig. 2C). Surprisingly, DFMO treatment did not affect cell fate in the 3D-3C organoids  
266 (Fig. 3A). Thus, we hypothesized that reduced mRNA translation through decreased  
267 polyamine availability was not the only determinant of the cell fate changes observed  
268 upon DENSpm treatment. Since additional putrescine supplementation only partially  
269 rescued the DENSpm effect on stem cell maintenance and de-differentiation, we  
270 speculated that putrescine itself might affect cell fate. Indeed, putrescine treatment in  
271 the 3D-3C organoids resulted in an increase in the number of  $\alpha 6^{+}/CD34^{+}$  stem cells  
272 (Fig. 3B). Increased stemness was confirmed by elevated colony-forming ability,

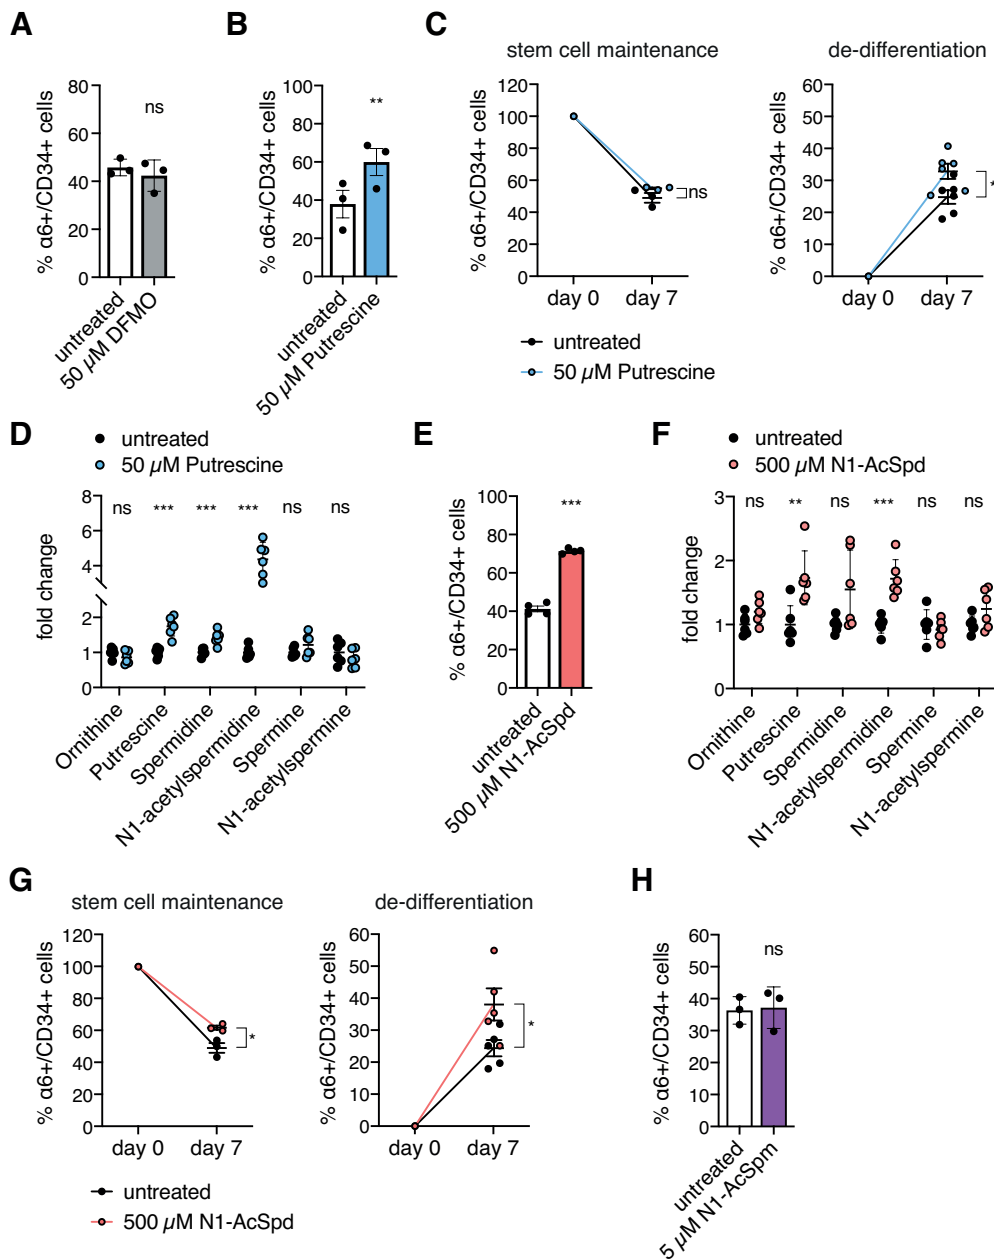

273

274 **Figure 3: N1-acetylspermidine is a novel regulator of hair follicle stem cell fate.** (A) Ratio of  
 275  $\alpha 6^{+}/CD34^{+}$  cells after two weeks of 3D-3C culture with or without DFMO treatment. Mean  $\pm$  SEM (n=3).  
 276 (B) Ratio of  $\alpha 6^{+}/CD34^{+}$  cells after two weeks of 3D-3C culture with or without putrescine treatment.  
 277 Mean  $\pm$  SEM (n=3). (C) Ratio of  $\alpha 6^{+}/CD34^{+}$  cells at day 0 and day 7 post-sorting starting from 100 %  
 278  $\alpha 6^{+}/CD34^{+}$  cells (left) or 100 %  $\alpha 6^{+}/CD34^{-}$  cells (right) with or without putrescine treatment. Mean  $\pm$   
 279 SEM (n $\geq$ 3). (D) Polyamine levels in 3D-3C cultured cells with and without putrescine treatment. Mean  $\pm$   
 280 SEM (n=6). (E) Ratio of  $\alpha 6^{+}/CD34^{+}$  cells after two weeks of 3D-3C culture with or without N1-AcSpd  
 281 treatment. Mean  $\pm$  SEM (n=3). (F) Polyamine levels in 3D-3C cultured cells with and without N1-AcSpd  
 282 treatment. Mean  $\pm$  SEM (n=6). (G) Ratio of  $\alpha 6^{+}/CD34^{+}$  cells at day 0 and day 7 post-sorting starting  
 283 from 100 %  $\alpha 6^{+}/CD34^{+}$  cells (left) or 100 %  $\alpha 6^{+}/CD34^{-}$  cells (right) with or without N1-AcSpd treatment.  
 284 Mean  $\pm$  SEM (n $\geq$ 3). (H) Ratio of  $\alpha 6^{+}/CD34^{+}$  cells after two weeks of 3D-3C culture with or without N1-  
 285 AcSpm treatment. Mean  $\pm$  SEM (n=3). ns: not significant (t test).

286 showing enhanced proliferative potential (Fig. S3A-B). Surprisingly, putrescine  
 287 supplementation specifically enhanced de-differentiation of  $\alpha 6^{+}/CD34^{-}$  progenitors to

288  $\alpha 6^{+}/CD34^{+}$  HFSCs, while stem cell maintenance was not affected (Fig. 3C). However,  
289 the effect was not as pronounced as with DENSpM treatment (Fig. 2E). To further  
290 investigate the effect of putrescine supplementation, we measured intracellular  
291 polyamine levels in the 3D-3C organoids. Spermidine and N1-acetylspermidine (N1-  
292 AcSpd) levels were increased in response to putrescine treatment (Fig. 3D). In  
293 addition, an elevation of putrescine confirmed the effectiveness of our treatment. Since  
294 both DENSpM and putrescine supplementation led to elevated N1-AcSpd levels  
295 (Fig. 2C and Fig. 3D), we speculated that increased N1-AcSpd might cause the cell  
296 fate changes. An increase in any polyamine would not be expected to reduce  
297 translation and would then be mediated through a distinct mechanism. Intriguingly, N1-  
298 AcSpd treatment significantly increased the number of  $\alpha 6^{+}/CD34^{+}$  stem cells in the  
299 3D-3C organoids (Fig. 3E). Stemness was confirmed by enhanced proliferative  
300 potential in the colony formation assay (Fig. S3C-D). As expected, analysis of  
301 puromycin incorporation confirmed that the effect on stemness occurred without a  
302 reduction of translation. Instead, translation rates were increased upon short-term N1-  
303 AcSpd treatment (72 h) (Fig. S3E-F), which did not affect the ratio of HFSCs in the 3D-  
304 3C organoids (Fig. S3G). Next, we measured intracellular polyamine levels upon N1-  
305 AcSpd treatment and found that apart from N1-AcSpd, also putrescine was increased  
306 (Fig. 3F). Thus, the effect of N1-AcSpd treatment on intracellular polyamines  
307 resembled the putrescine supplementation (Fig. 3D). However, in contrast to  
308 putrescine addition, N1-AcSpd treatment enhanced not only de-differentiation, but also  
309 stem cell maintenance when starting from pure populations (Fig. 3G). In stark contrast,  
310 supplementation with N1-acetylspermine (N1-AcSpm) did not influence the ratio of  
311 HFSCs (Fig. 3H). Thus, elevation of polyamines in general was not sufficient; rather,  
312 putrescine and N1-AcSpd treatment had specific effects on cell fate. Overall, these

313 data implicate N1-AcSpd as a novel cell fate regulator that acts independently of  
314 reduced translation.

315

316 **N1-acetylspermidine treatment affects hair follicle stem cell fate by increasing**  
317 **proliferation.**

318 To investigate the molecular mechanism by which N1-AcSpd supplementation  
319 promotes stemness, we performed RNA-sequencing of 3D-3C cultured cells upon  
320 short-term N1-AcSpd treatment (72 h). HFSCs and progenitor cells were purified and  
321 analyzed separately (Fig. S4A). We compared  $\alpha6+/CD34-$  cells with  $\alpha6+/CD34+$  cells  
322 to identify differentially expressed genes for control (CTR) and N1-AcSpd treatment  
323 (Fig. S4B). The two groups of differentially expressed genes were subjected to further  
324 analysis. Around 2.200 genes with differential expression between cell types were not  
325 affected by N1-AcSpd treatment (Fig. S4C). 851 genes were differentially expressed  
326 between HFSCs and progenitors only in the presence of N1-AcSpd, while 540 genes  
327 were differentially expressed between cell types exclusively in untreated control cells  
328 (Fig. S4C). GO term analysis was performed with the three different groups using  
329 Metascape (Zhou et al., 2019). Strikingly analysis of the genes differentially expressed  
330 between HFSCs and progenitors only during N1-AcSpd treatment revealed that most  
331 of the ten highest ranked GO terms were linked to cell cycle progression (Fig. 4A). The  
332 most significant GO term was cell division, of which 54 genes were present among the  
333 851 differentially expressed genes in N1-AcSpd treatment (Fig. S4D). Interestingly,  
334 expression of the majority of these 54 genes was higher in  $\alpha6+/CD34+$  stem cells  
335 (Fig. 4B). Importantly, N1-AcSpd treatment affected the amplitude of the fold change;  
336 the expression of these genes was higher also in the untreated  $\alpha6+/CD34+$  stem cells  
337 (Fig. 4B). Consistently, EdU incorporation was higher in untreated  $\alpha6+/CD34+$  HFSCs  
338 compared to progenitor cells (Fig. S4E). Together, these data suggest that N1-AcSpd

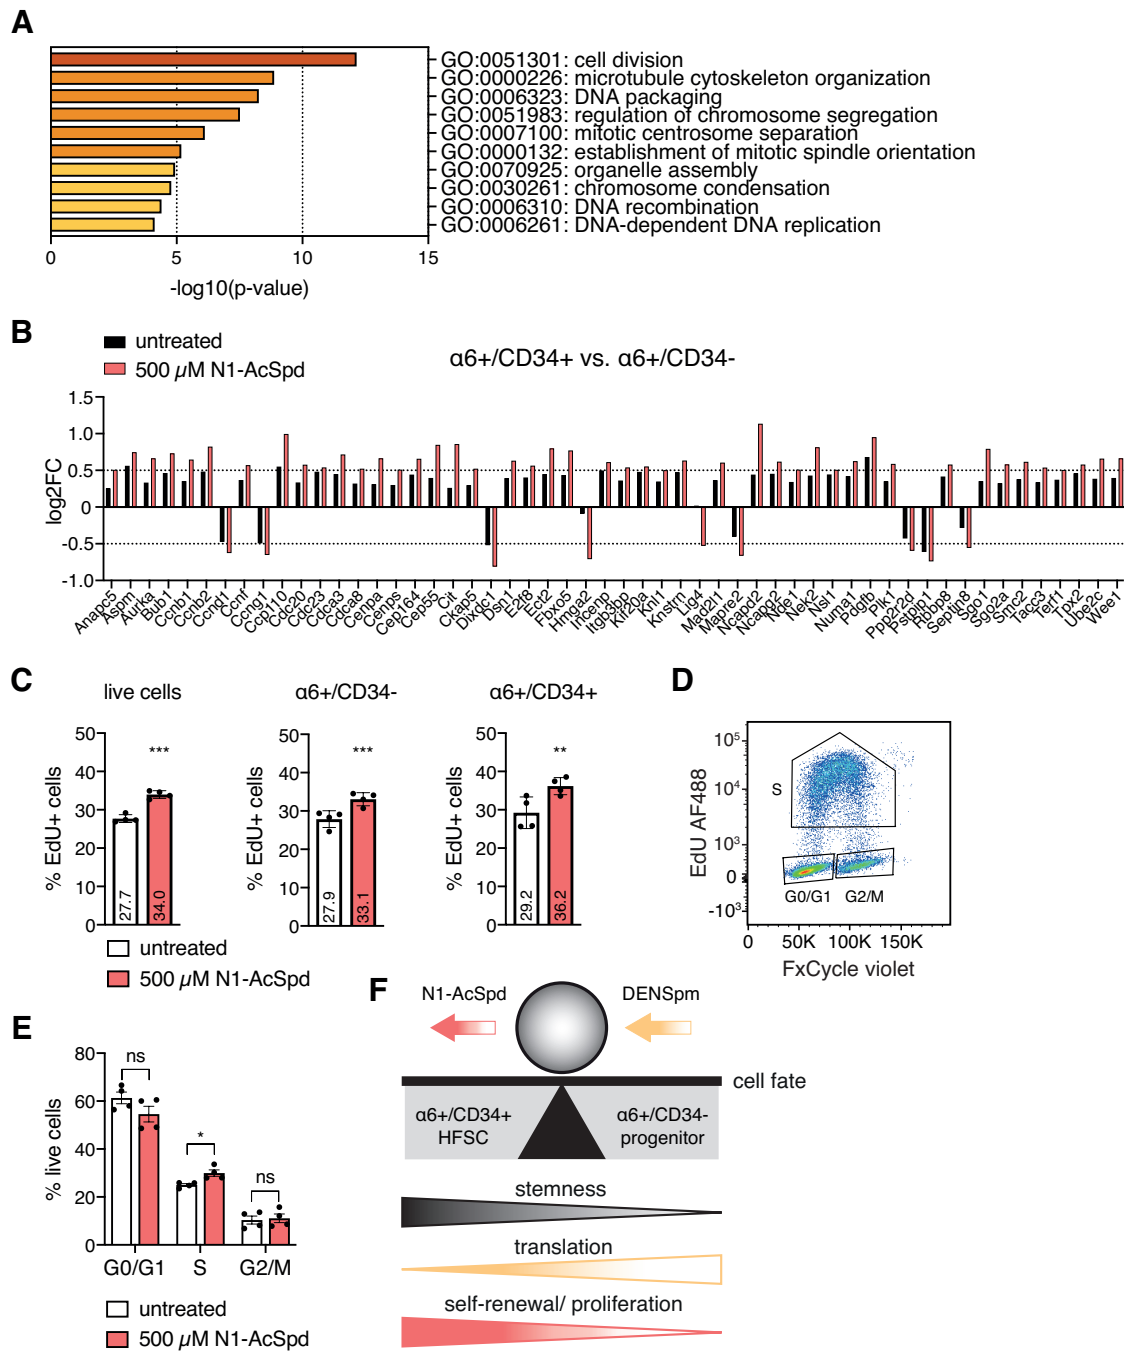

339

340 **Figure 4: N1-acetylspermidine treatment affects cell fate by increasing cell cycle progression.** (A)  
 341 GO term analysis of differentially regulated genes between cell types (p-value < 0.05, log<sub>2</sub>FC >  $\pm$ 0.5)  
 342 only upon N1-AcSpd treatment (depicted in red in Fig. S4A, biological process, metascpe.org). (B)  
 343 log<sub>2</sub>FC of the genes associated with the GO term “cell division” in untreated and N1-AcSpd treated  
 344 cells. The ratio of the log<sub>2</sub>FC in  $\alpha$ 6+/CD34+ vs.  $\alpha$ 6+/CD34- cells is shown. (C) Ratio of EdU+ cells with  
 345 or without N1-AcSpd treatment (72 h). EdU was incorporated for 2 h. Mean  $\pm$  SEM (n=4). \*\*\* p<0.01;  
 346 \*\* p<0.01 (t test). (D) Dot plot of FxCycle violet intensity and EdU AF488 intensity, separating the phases  
 347 of the cell cycle (G0/G1, S, G2/M). (E) Ratio of live cells with or without N1-AcSpd treatment (72 h)  
 348 according to their cell cycle phase distribution. Mean  $\pm$  SEM (n=4). \* p<0.05; ns: not significant (t test).  
 349 (F) Model of polyamine-controlled effects on cell fate. Manipulation of translation or proliferation by  
 350 DENSPm or N1-AcSpd, respectively, results in the enrichment of HFSCs.

351 selectively promoted self-renewal of HFSCs. GO term analysis of the around 2.200  
 352 genes that differed between HFSCs and progenitors without being affected by N1-



353 AcSpd revealed skin development as the most significant GO term (Fig. S4F). This  
354 suggests that N1-AcSpd treatment did not affect general cell identity in the 3D-3C  
355 organoids. Consistently, a comparison of the gene expression changes between cell  
356 types in a heat map showed a clear separation of  $\alpha 6^{+}/CD34^{+}$  HFSCs and  $\alpha 6^{+}/CD34^{-}$   
357 progenitors (Fig. S4G). Although N1-AcSpd treated cells clustered separately of  
358 control cells, their gene expression was very similar to the respective cell type in the  
359 control (Fig. S4G). Analysis of the 540 genes differentially expressed between cell  
360 types only in untreated cells showed low significance for all GO terms. The most  
361 significant GO terms were intraciliary transport and cilium organization (Fig. S4H).  
362 Since the analysis of global gene expression changes clearly indicated that N1-AcSpd  
363 treatment would affect proliferation, we measured EdU incorporation. Importantly,  
364 short-term N1-AcSpd supplementation (72 h) increased the number of EdU<sup>+</sup> cells  
365 (Fig. 4C). The effect on  $\alpha 6^{+}/CD34^{+}$  HFSCs was higher compared to  $\alpha 6^{+}/CD34^{-}$   
366 progenitor cells (Fig. 4C). Still, consistent with increased de-differentiation and  
367 elevated stem cell maintenance, proliferation of both populations was affected by the  
368 treatment. Furthermore, we analyzed the cell cycle phase distribution of the cells using  
369 FxCycle violet staining. Plotting of FxCycle violet intensity on the x-axis and EdU  
370 AF488 intensity on the y-axis enabled clear separation of the different cell cycle phases  
371 (Fig. 4D). Consistent with increased EdU incorporation, we observed faster cell cycle  
372 progression with fewer cells in G0/G1 phase and more cells in S phase upon short-  
373 term N1-AcSpd treatment (72 h) (Fig. 4E). The number of cells in G2/M phase was not  
374 changed. Taken together, these data suggest that the acetylated polyamine N1-AcSpd  
375 fulfills a functional role in cell cycle progression and that it affects cell fate by increasing  
376 proliferation. Overall, in this study we decipher the different and independent  
377 polyamine-controlled effects on HFSC fate. We demonstrate that decreasing  
378 translation rates by the depletion of natural polyamines through DENSp<sub>m</sub>, as well as

379 enhancing proliferation by N1-AcSpd shifts the balance towards the stem cell state in  
380 the 3D-3C organoids (Fig. 4F).

## 381 **Discussion**

382 In this study we delineate the different routes of polyamine-mediated regulation of  
383 HFSC maintenance and function. First, we show that reduced translation is not only a  
384 marker of the stem cell state. Instead, a forced decrease of translation was sufficient  
385 to enhance stemness. Next, we noted low polyamine levels in  $\alpha 6+$ /CD34+ stem cells  
386 and depletion of the natural polyamines with DENSp<sub>m</sub> resulted in enhanced HFSC  
387 maintenance. Strikingly, full depletion of polyamines by DFMO did not recapitulate our  
388 findings with DENSp<sub>m</sub>, suggesting that reduced translation was not the only relevant  
389 consequence of polyamine changes in cell fate. Indeed, putrescine supplementation  
390 had a beneficial effect on progenitor cell de-differentiation. This was mediated by N1-  
391 AcSpd that we identify as novel regulator of HFSC fate, acting independently of  
392 reduced translation by increasing proliferation.

393 Previously, Blanco et al. (2016) showed that translation becomes elevated during the  
394 hair cycle growth phase when cells become activated and differentiate. In contrast,  
395 quiescent HFSCs in the resting phase show low translation. This agrees with other  
396 studies showing that translation is upregulated during differentiation (Sampath et al.,  
397 2008, Signer et al., 2014, Zismanov et al., 2016). Importantly, we can reproduce these  
398 findings *in vivo* and in the 3D-3C HFSC organoid culture;  $\alpha 6+$ /CD34+ stem cells in the  
399 organoids recapitulate key features of HFSCs *in vivo*. Strikingly, forced inhibition of  
400 translation by loss of NOP2/Sun RNA methyltransferase family member 2 (NSUN2) in  
401 the mouse blocks the differentiation of HFSCs to progenitor cells (Blanco et al., 2011),  
402 clearly showing that upregulation of translation is necessary for differentiation in the  
403 HF. Using G418 treatment or the depletion of natural polyamines to reduce translation  
404 in the organoids, we confirm promotion of the stem cell state. We further show that the  
405 number of stem cells was elevated due to enhanced self-renewal rather than  
406 attenuated differentiation using EdU incorporation during DENSp<sub>m</sub> treatment.

407 Additionally, we see an effect on progenitor cell de-differentiation, further supporting  
408 the idea that a forced decrease of translation is sufficient to promote stemness in the  
409 3D-3C organoids.

410 Previously, the acetylated polyamines were mostly described as the major group of  
411 polyamines exported from the cell (Seiler & Dezeure, 1990). Extending this notion, we  
412 find that the intracellular accumulation of N1-AcSpd has an effect on stemness. This  
413 occurs without reducing translation, which is consistent with previous observations that  
414 acetylated polyamines have no effect on protein synthesis *in vitro* (Kakegawa et al.,  
415 1991). Instead, RNA-sequencing of purified cell populations from the organoids  
416 revealed that N1-AcSpd treatment affected expression of cell cycle-associated genes.  
417 Interestingly, these same genes were found expressed at higher levels in  $\alpha 6^{+}/CD34^{+}$   
418 stem cells, which also display higher EdU incorporation compared to progenitor cells  
419 in the organoid cultures. Importantly, increased proliferation and stemness have been  
420 linked before. A study in ESCs suggests that elevated CDK activity, and thus increased  
421 cell cycle progression, contributes to stem cell maintenance (Liu et al., 2017).  
422 Strikingly, several studies have described that cells in the G1 phase are more  
423 susceptible to cell fate changes and that differentiation is associated with G1 phase  
424 lengthening (Calder et al., 2013, Clegg et al., 1987, Sela et al., 2012). Consistently,  
425 reprogramming efficiency seems to be linked to successful acceleration of the cell  
426 cycle (Guo et al., 2014, Ruiz et al., 2011). Of note, forced overexpression of AMD1 or  
427 ODC in mouse fibroblasts, resulting in the accumulation of polyamines, improves  
428 reprogramming efficiency (Zhang et al., 2012, Zhao et al., 2012). Our results suggest  
429 that this effect is caused by increased proliferation. Collectively, these data indicate  
430 that both stem cell maintenance and de-differentiation might be improved by elevated  
431 cell cycle progression upon N1-AcSpd treatment in our 3D-3C organoid culture.

432 Polyamines have been implicated in cell cycle progression before. Under normal  
433 growth conditions, polyamine levels are dynamically regulated during the cell cycle  
434 (Sunkara et al., 1981), which is due to cyclical changes in activity of ODC and AMD1  
435 (Fredlund et al., 1995). Consistently, several studies have shown that polyamine  
436 depletion results in cell cycle arrest (Odenlund et al., 2009, Ray et al., 1999, Yamashita  
437 et al., 2013). Intriguingly, ODC activity was shown to be increased by N1-AcSpd, while  
438 N1-AcSpm, which did not influence cell fate in the organoid culture, does not affect  
439 ODC activity (Canellakis et al., 1989). Thus, activation of ODC might be an important  
440 step in cell fate regulation via increased cell cycle progression. Strikingly, expression  
441 of ODC is also dynamically regulated during the hair cycle. Nancarrow et al. (1999)  
442 showed that ODC is abundantly expressed in proliferating bulb cells of anagen follicles,  
443 while entry of the follicle into catagen is accompanied by down-regulation of ODC.  
444 These data implicate that polyamine levels, which are controlled by ODC, might track  
445 proliferation rates in the hair follicle. Additionally, the authors revealed expression of  
446 ODC in ORS cells in vicinity of the follicle bulge region (Nancarrow et al., 1999). After  
447 the anagen growth phase, some ORS cells return to the bulge region, where they  
448 resume quiescence and CD34 expression. These cells become the primary stem cells  
449 for the initiation of the next hair cycle (Hsu et al., 2011). This process is comparable to  
450 the de-differentiation of  $\alpha 6^{+}/CD34^{-}$  progenitor cells back to the stem cell state in the  
451 3D-3C organoids, which was enhanced by putrescine and N1-AcSpd supplementation.  
452 Overall, these data suggest that ODC activity, cell cycle progression, and cell fate are  
453 tightly linked. In the HF, quiescent stem cells ensure reduced translation rates by low  
454 polyamine levels, which increase upon activation due to elevated ODC activity,  
455 resulting in accelerated cell cycle progression. Consistently, skin-specific ODC  
456 overexpression results in hair loss beginning 2 to 3 weeks after birth, demonstrating  
457 the need for low polyamine levels in HFSC quiescence (Soler et al., 1996). Our data

458 suggest that enhanced cell cycle progression promotes stem cell self-renewal upon  
459 activation, while differentiation is decreased. At the same time, cell cycle progression  
460 might be required for successful de-differentiation of ORS cells back to HFSCs, a  
461 notion supported by elevated ODC expression in ORS cells.

462 Overall, this study dissects independent routes of polyamine-controlled regulation of  
463 cell fate: While depletion of natural polyamines endogenously reduced translation,  
464 addition of N1-AcSpd accelerated cell cycle progression. Previously, acetylated  
465 polyamines were described primarily as the major polyamine species exported from  
466 the cell. Here, we demonstrate that N1-AcSpd directly influenced cell fate decisions  
467 via increased proliferation. Thus, our study explains why elevated polyamine levels  
468 and low translation rates are not mutually exclusive in stem cell maintenance. Instead,  
469 they regulate different aspects of cell fate. While low translation rates favor quiescence  
470 *in vivo*, enhanced cell cycle progression ensures stem cell self-renewal upon  
471 activation. ODC activity might function as the molecular switch to regulate polyamine  
472 availability and thus cell fate in the HF. Over the long-term, N1-AcSpd treatment could  
473 be a viable intervention to tackle age-associated diseases caused by a decline in tissue  
474 homeostasis due to stem cell exhaustion.

## 475 **Methods**

476

### 477 **Mouse husbandry**

478 Animals were housed on a 12:12 h light:dark cycle with *ad libitum* access to food under  
479 pathogen-free conditions in individually ventilated cages. All animals were kept in  
480 C57BL/6J background. Animal care and experimental procedures were in accordance  
481 with the institutional and governmental guidelines.

482

### 483 **Isolation of epidermal cells**

484 Isolation of epidermal cells from mice in telogen stage was performed as described  
485 previously (Chacon-Martinez et al., 2017). In brief, mouse skin was incubated on 0.8 %  
486 trypsin (ThermoFisher Scientific) for 50 min at 37 °C. The skin was transferred to 8 ml  
487 KGM medium and the epidermis was separated from the dermis. After centrifugation,  
488 the keratinocytes were resuspended in ice cold KGM medium and embedded in growth  
489 factor-reduced matrigel (Corning Inc.).

490

### 491 **Culture of hair follicle stem cell organoids**

492 Hair follicle stem cell organoids were cultured in KGM medium: MEM medium  
493 (Spinner's modification, Sigma-Aldrich), supplemented with 8 % fetal bovine serum  
494 (chelated, ThermoFisher Scientific), penicillin/streptavidin (ThermoFisher Scientific), L-  
495 glutamine (ThermoFisher Scientific), insulin (5 µg/ml, Sigma-Aldrich), hydrocortisone  
496 (0.36 µg/ml, Calbiochem), EGF (10 ng/ml, Sigma-Aldrich), transferrin (10 µg/ml,  
497 Sigma-Aldrich), phosphoethanolamine (10 µM, Sigma-Aldrich), ethanolamine (10 µM,  
498 Sigma-Aldrich), CaCl<sub>2</sub> (14.5 µM, Sigma-Aldrich). 5 µM Y27632, 20 ng/ml mouse  
499 recombinant VEGF, 20 ng/ml human recombinant FGF2 (all Miltenyi Biotech) were  
500 added to KGM medium. The cells were grown at 37 °C in 5 % CO<sub>2</sub>.

501

502 **Cell maintenance**

503 NIH3T3 fibroblasts were grown in DMEM containing 4.5 g/L glucose supplemented  
504 with 10 % fetal bovine serum and penicillin/streptavidin (all ThermoFisher Scientific) at  
505 37 °C in 5 % CO<sub>2</sub> on non-coated tissue culture plates.

506

507 **Colony formation assay**

508 NIH3T3 fibroblasts were seeded on collagen G-coated (30 µg/ml in PBS, Biochrom  
509 AG) tissue culture plates. The cells were grown at 37 °C in 5 % CO<sub>2</sub> for two days before  
510 proliferation was inhibited with mitomycin C (Sigma-Aldrich).

511 Hair follicle stem cells were grown in 3D-3C organoids for two weeks and analyzed by  
512 flow cytometry. 4000 cells were seeded per 6-well on the fibroblast layer in  
513 MEM/HAM's F12 (FAD) medium with low Ca<sup>2+</sup> (50 µM, Biochrom AG), supplemented  
514 with 10% fetal bovine serum (chelated, ThermoFisher Scientific), penicillin/streptavidin  
515 (ThermoFisher Scientific), L-glutamine (ThermoFisher Scientific), ascorbic acid  
516 (50 µg/ml, Sigma-Aldrich), adenine (0.18 mM, Sigma-Aldrich), insulin (5 µg/ml, Sigma-  
517 Aldrich), hydrocortisone (0.5 µg/ml, Sigma-Aldrich), EGF (10 ng/ml, Sigma-Aldrich),  
518 and cholera enterotoxin (10 ng/ml, Sigma-Aldrich). The cells were grown for 2-3 weeks  
519 at 32 °C in 5 % CO<sub>2</sub> until colonies were formed. Remaining fibroblasts were removed  
520 using 0.25 % trypsin-ETDA (ThermoFisher Scientific) for 2 min at 37 °C. Trypsin was  
521 stopped using supplemented DMEM. After washing the plates with PBS, keratinocytes  
522 were fixed with 4 % PFA (Sigma-Aldrich) for 15 min at RT. The cells were washed with  
523 PBS twice and the colonies were stained using 1 % crystal violet (Sigma-Aldrich in  
524 PBS) for 1 h at RT on an orbital shaker. The wells were washed with tap water until no  
525 stain was released and air dried. The plates were scanned and the number of colonies  
526 was counted manually.



527

## 528 **Flow cytometry**

529 Matrigel droplets were degraded in 0.5 % trypsin, 0.5 mM EDTA in PBS for 8 min at  
530 37 °C. Trypsin was neutralized using cold KGM. After centrifugation for 5 min at  
531 2000 rpm cells were washed with FACS buffer (2 % FBS, 2 mM EDTA in PBS).  
532 Surface marker staining was performed for 30 min on ice with the following antibodies:  
533 CD34-eFluor 660 (eBioscience, clone RAM34, 1:100) and ITGA6-PE/Cy7 (Biolegend,  
534 clone GoH3, 1:1000) for sorting or CD34-eFluor 660 (eBioscience, clone RAM34,  
535 1:100) and ITGA6-pacific blue (Biolegend, clone GoH3, 1:200) for analysis. Freshly  
536 isolated keratinocytes were stained additionally with Sca1-Pacific blue (Biolegend,  
537 clone D7, 1:400). 7AAD or PI was used to exclude dead cells. Cells were analyzed on  
538 FACSCantoll (BD Biosciences) or sorted on FACS Aria IIIu Svea and FACS Aria Fusion  
539 sorters (BD Biosciences). Sorted cells were collected in 15 ml tubes containing KGM  
540 at 4 °C.

541

## 542 **EdU incorporation and detection**

543 Cell proliferation was assessed using the Click-iT™ Plus EdU Alexa Fluor™ 488 Flow  
544 Cytometry Assay Kit (ThermoFisher) following the manufacturer's instructions. Cells  
545 were grown for 9 days in 3D-3C culture before 10 µM EdU was added to the medium  
546 and incubated for 2 h or 24 h. Matrigel droplets were degraded, the cells were washed  
547 with PBS and subsequently stained with fixable LIVE/DEAD-violet (ThermoFisher,  
548 1:500) for 20 min at RT. The cells were washed with FACS buffer and surface marker  
549 staining was performed for 30 min on ice using CD34-eFluor 660 (eBioscience, clone  
550 RAM34, 1:100) and ITGA6-PE/Cy7 (Biolegend, clone GoH3, 1:1000). The cells were  
551 washed with 1 % BSA in PBS, fixed with 4 % PFA for 10 min at RT and permeabilized  
552 using Click-iT saponin-based permeabilization buffer for 15 min at RT. The EdU

553 reaction cocktail was prepared following the manufacturer's instructions and incubated  
554 for 30 min at RT in the dark after washing the cells. The cells were analyzed on  
555 FACSCantoll.

556

### 557 **Cell cycle analysis**

558 Cell proliferation was assessed using the Click-iT™ Plus EdU Alexa Fluor™ 488 Flow  
559 Cytometry Assay Kit (ThermoFisher) as described above. Cells were grown for two  
560 weeks in 3D-3C culture before 10 µM EdU was added to the medium and incubated  
561 for 2 h. Matrigel droplets were degraded, the cells were washed with PBS and stained  
562 with fixable Zombie NIR dye (Biolegend, 1:500) for 20 min at RT. The cells were  
563 washed, fixed, and permeabilized and the EdU reaction cocktail was incubated as  
564 described above. Subsequently, the cells were permeabilized using 0.1 % triton X-100  
565 in PBS for 15 min at RT and stained with FxCycle violet (ThermoFisher, 1:500) for  
566 30 min at RT. The cells were analyzed on FACSCantoll without further washing.

567

### 568 **Annexin V staining**

569 Matrigel droplets were degraded in 0.5 % trypsin, 0.5 mM EDTA in PBS for 8 min at  
570 37 °C. Trypsin was neutralized using cold KGM. After centrifugation for 5 min at  
571 2000 rpm cells were washed with FACS buffer. Surface marker staining was performed  
572 for 30 min on ice using CD34-eFluor 660 (eBioscience, clone RAM34, 1:100) and  
573 ITGA6-pacific blue (Biolegend, clone GoH3, 1:200). Cells were washed with PBS and  
574 stained with annexin V-AF488 (ThermoFisher Scientific, 1:20 in 100 µl annexin-binding  
575 buffer per sample) for 15 min at RT. 100 µl annexin-binding buffer containing PI were  
576 added per sample. The cells were analyzed on FACSCantoll.

577

### 578 **Puromycin incorporation**

579 Cells were incubated with 10 µg/ml puromycin in the medium for exactly 10 min at  
580 37 °C. The cells were washed with PBS and collected in RIPA buffer (50 mM TrisHCl,  
581 120 mM NaCl, 0.1 % SDS, 1 % NP40, 0.5 % deoxycholate) with proteinase and  
582 phosphatase inhibitors (Roche Diagnostics GmbH).

583

#### 584 **Western Blot analysis**

585 Protein concentration of cell lysates was determined using the Pierce™ BCA protein  
586 assay kit according to manufacturer's instructions (ThermoFisher Scientific). Samples  
587 were subsequently subjected to SDS-PAGE and blotted on a nitrocellulose membrane.  
588 The following antibodies were used in 5 % low-fat milk in TBS-Tween buffer:  
589 Puromycin (ms, Millipore, 12D10, 1:10.000), β-actin (ms, Sigma, AC-74, 1:25.000).  
590 After incubation with HRP-conjugated secondary antibody (Invitrogen, 1:5000), the blot  
591 was developed using ECL solution (Merck Millipore). Films were used for detection  
592 (Amersham Biosciences).

593

#### 594 **RNA isolation and qRT-PCR**

595 Matrigel droplets were degraded in 0.5 % trypsin, 0.5 mM EDTA in PBS for 8 min at  
596 37 °C. Trypsin was neutralized using cold KGM. After centrifugation for 5 min at  
597 2000 rpm cells were washed with PBS. The pellet was resuspended in QIAzol (Qiagen)  
598 and frozen in liquid nitrogen. Sorted and freshly isolated keratinocytes were collected  
599 in QIAzol and frozen in liquid nitrogen. Samples were subjected to three freeze/thaw  
600 cycles (liquid nitrogen/ 37 °C water bath). Half of the total volume of QIAzol was added  
601 per sample. After incubation for 5 min at RT, 200 µl chloroform were added per 1 ml  
602 QIAzol. The samples were vortexed, incubated for 2 min at RT, and centrifuged at  
603 10.000 rpm and 4 °C for 15 min. The aqueous phase was mixed with an equal volume  
604 of 70 % ethanol and transferred to a Rneasy Mini spin column (Qiagen). Total RNA

605 was isolated with the Rneasy Mini Kit (Qiagen) according to manufacturer's  
606 instructions. cDNA was generated using the iScript cDNA Synthesis Kit (Bio-Rad  
607 Laboratories Inc.). qRT-PCR was performed using Power SYBR Green master mix  
608 (Applied Biosystems) on a ViiA 7 Real-Time PCR System (Applied Biosystems).  
609 Primer sequences are listed below.

610 **Table 1: Primer sequences for qRT-PCR.**

| Primer/gene name | Sequence (5' → 3')           |
|------------------|------------------------------|
| huTBP_fwd        | GGGTTTTCCAGCTAAGTTCTTG       |
| huTBP_rev        | CTGTAGATTAAACCAGGAAATAACTCTG |
| huSSAT_fwd       | GGTTGCAGAAGTGCCGAAAG         |
| huSSAT_rev       | GTAAGTTGCCAATCCACGGG         |

611

612

### 613 **Preparation of 3' RNA-sequencing libraries**

614 Sorted cells were collected in QIAzol and frozen in liquid nitrogen. Total RNA was  
615 isolated as described above. 50 ng RNA per sample were used for cDNA synthesis  
616 with Maxima H Minus reverse transcriptase (ThermoFisher Scientific). During reverse  
617 transcription, unique barcodes including unique molecular identifiers (UMI) were  
618 attached to each sample. After cDNA synthesis, all samples were pooled and  
619 processed in one single tube. DNA was purified using AmpureXP beads (Beckman  
620 Coulter) and the eluted cDNA was subjected to Exonuclease I treatment (New England  
621 Biolabs). cDNA was PCR-amplified for 12 cycles and subsequently purified. After  
622 purification, cDNA was tagmented in 5 technical replicates of 1 ng cDNA each using  
623 the Nextera XT Kit (Illumina), according to manufacturer's instructions. The final library  
624 was purified and concentration and size were validated by Qubit and High Sensitivity  
625 TapeStation D1000 analyses. A detailed protocol for library preparation is available on  
626 request. Sequencing was carried out on an Illumina NovaSeq system.

627

## 628 **Bioinformatic analysis of 3' RNA-sequencing data**

629 The raw reads were demultiplexed and the UMI-tag was added to each read name  
630 using FLEXBAR (Dodt et al., 2012). The second end of the read-pairs were mapped  
631 using Kallisto creating pseudo-alignments to the mouse reference genome mm10  
632 (Bray et al., 2016). UMI-tags were assigned using BEDTools intersect and bash re-  
633 formatting (Quinlan & Hall, 2010). An R script was used to count the unique UMI-tags  
634 per gene. Differential gene expression was calculated using the R package Deseq2  
635 (Love et al., 2014). Only genes with an average of more or equal to 5 reads over all  
636 samples were used for the analysis. Only genes with an adjusted p-value  $\leq 0.05$   
637 ( $\alpha 6+ / CD34-$  vs.  $\alpha 6+ / CD34+$ ; untreated or treated) are shown in the heatmap. Venn  
638 diagrams were generated using the R package VennDiagram. Functional enrichment  
639 analysis was performed using the Metascape tool [<http://metascape.org>] (Zhou et al.,  
640 2019). Only genes with a p-value  $< 0.05$  and a  $\log_2FC > \pm 0.5$  ( $\alpha 6+ / CD34-$  vs.  
641  $\alpha 6+ / CD34+$ ; untreated or treated) were defined as differentially expressed and  
642 included in the functional enrichment analysis.

643

## 644 **Polyamine extraction from cells**

645 Matrigel droplets were degraded in 0.5 % trypsin, 0.5 mM EDTA in PBS for 8 min at  
646 37 °C. Trypsin was neutralized using cold KGM. After centrifugation for 5 min at  
647 2000 rpm cells were washed with PBS. Sorted cells were centrifuged and washed with  
648 PBS. The pellet was flash frozen in liquid nitrogen. The cells were lysed in ddH<sub>2</sub>O by  
649 freeze/thaw cycles and the protein concentration was determined using the Pierce™  
650 BCA protein assay kit (ThermoFisher Scientific). Polyamines were extracted by Blish  
651 and Dyer extraction (Noga et al., 2012, Pieragostino et al., 2015). In brief, a  
652 methanol:chloroform mixture 2:1 (v/v) was added to a volume of cell lysate, which

653 corresponded to 100 µg of protein and incubated 1 h at 4 °C. Samples were  
654 centrifuged for 5 min at 3000 rcf at 4 °C and the liquid phase was transferred and dried  
655 in a SpeedVac Vacuum Concentrator (Genevac). Samples were reconstituted with  
656 15 µL aqueous acetonitrile 2:3 (v/v) and 10 µl were injected into the LC-MS system.

657

### 658 **Targeted analysis of polyamines by LC-MS**

659 The identification of polyamines was performed on a triple stage quadrupole (TSQ  
660 Altis, ThermoFisher Scientific GmbH) coupled with a binary pump system (Vanquish,  
661 ThermoFisher Scientific GmbH). Polyamine species were separated using a reverse  
662 column (Xselect column, 2.1x100mm, 2,5 µm) using solvent A (water with 0.1 % formic  
663 acid) and B (acetonitrile with 0.1 % formic acid) as previously reported (Hakkinen et  
664 al., 2008, Hakkinen et al., 2013, Sanchez-Lopez et al., 2009).

665 The gradient started from 0.1 % eluent B and ramped to 0.3 % eluent B in 0.5 min. It  
666 ramped further to 0.5 % eluent B in 0.5 min and to 1 % B in the next 0.5 min. The  
667 gradient increased to 2 % eluent B in the next minute, then it ramped to 5 % eluent B  
668 in 1 min. In the following 3 min it went to 95 % eluent B and stayed constant for 3 min.  
669 Afterwards the gradient decreased to 0.1 % eluent B in 2 min and stayed constant for  
670 3 min adding up to a total time of 15 min. The column was heated to 30 °C using a flow  
671 rate of 100 µl/min. The LC system was flushed in between runs with isopropanol:water  
672 75:25 (v/v) with 0.1 % FA.

673 Polyamines were detected using heated electrospray ionization (HESI) with the  
674 following parameters: 10 (a.u.) sheath gas, 5 (a.u.) auxiliary, 200 °C transfer ion  
675 capillary and 3 kV for spray voltage.

676 Relative quantification was performed using selected ion monitoring chromatogram  
677 mode (SIM-Q1) in positive ion mode using a scan rate of 1000 Da/sec, Q1 resolution  
678 was set to 0.7 *m/z* and calibrated RF lenses were used. The following ions were

679 monitored: arginine → 175.2, ornithine → 133.17, putrescine → 89.17, spermidine →  
680 146.23, spermine → 203.32, N1-acetylspermidine → 188.25, N1-acetylspermine →  
681 245.34, N1,N11-diethylnorspermine → 245.39. The relative response for each  
682 polyamine was calculated using Spermidine-(butyl-d8) as internal standard.

683 **Table 2: Detailed description of the detected metabolites.**

| Name                      | Elemental composition                                        | retention time (min) | Mass (amu) | [M+H] <sup>+</sup> (m/z) |
|---------------------------|--------------------------------------------------------------|----------------------|------------|--------------------------|
| Arginine                  | C <sub>6</sub> H <sub>14</sub> N <sub>4</sub> O <sub>2</sub> | 2.38                 | 174.111    | 175.118                  |
| Ornithine                 | C <sub>5</sub> H <sub>12</sub> N <sub>2</sub> O <sub>2</sub> | 2.73                 | 132.089    | 133.097                  |
| Putrescine                | C <sub>4</sub> H <sub>12</sub> N <sub>2</sub>                | 2.41                 | 88.099     | 89.107                   |
| Spermidine                | C <sub>7</sub> H <sub>19</sub> N <sub>3</sub>                | 2.22                 | 145.157    | 146.165                  |
| Spermine                  | C <sub>10</sub> H <sub>26</sub> N <sub>4</sub>               | 2.46                 | 202.215    | 203.223                  |
| N1-acetylspermidine       | C <sub>9</sub> H <sub>21</sub> N <sub>3</sub> O              | 3.14                 | 187.167    | 188.175                  |
| N1-acetylspermine         | C <sub>12</sub> H <sub>28</sub> N <sub>4</sub> O             | 3.05                 | 244.225    | 245.233                  |
| N1,N11-diethylnorspermine | C <sub>13</sub> H <sub>32</sub> N <sub>4</sub>               | 2.30                 | 244.262    | 245.269                  |

684

#### 685 **Data Availability**

686 The raw RNA-sequencing data in this publication are available upon request from the  
687 authors.

688 **Acknowledgements**

689 We thank all M.S.D. laboratory members for lively and helpful discussions. We thank  
690 F.A.M.C. Mayr for critical reading of the manuscript. We thank K. Folz-Donahue and  
691 L. Schumacher from the FACS and imaging core facility, F. Metge, A. Iqbal and J.  
692 Boucas from the Bioinformatics core facility and the Comparative Biology Facility at  
693 the Max Planck Institute for Biology of Ageing. We thank Patrick Wollek for expert  
694 mouse work. This study was supported by the Cologne Graduate School for Ageing  
695 Research (to K.A.), by the Deutsche Forschungsgemeinschaft (DFG, German  
696 Research Foundation) – Projektnummer 73111208 – SFB 829 (to S.A.W. and M.S.D.),  
697 by the Jane and Aatos Erkko Foundation (to S.A.W.), by the ERC-StG 640254 and  
698 ERC-PoC 768524 (to M.S.D.), and by the Max Planck Society (to Ad.An., P.T., S.A.W.,  
699 and M.S.D.).

700

701 **Conflict of Interest**

702 The authors declare no potential competing interests.

703

704 **Authorship**

705 K.A., C.S.K., An.An., A.P., C.A.C.-M., P.T., S.A.W. and M.S.D designed the research.  
706 Ad.An. gave feedback throughout the project. K.A. (original draft), C.S.K., A.P., P.T.,  
707 S.A.W. and M.S.D (review & editing) wrote the manuscript. An.An. and C.L. performed  
708 LC-MS analysis. A.P. prepared the library for 3' RNA-sequencing. K.A. performed all  
709 other experiments. Funding acquisition: Ad.An., P.T., S.A.W. and M.S.D.



710 **References**

- 711 Bar-Nun S, Shneyour Y, Beckmann JS (1983) G-418, an elongation inhibitor of 80 S  
712 ribosomes. *Biochim Biophys Acta* 741: 123-7
- 713 Blanco S, Bandiera R, Popis M, Hussain S, Lombard P, Aleksic J, Sajini A, Tanna H,  
714 Cortes-Garrido R, Gkatza N, Dietmann S, Frye M (2016) Stem cell function and stress  
715 response are controlled by protein synthesis. *Nature* 534: 335-40
- 716 Blanco S, Kurowski A, Nichols J, Watt FM, Benitah SA, Frye M (2011) The RNA-  
717 methyltransferase Misu (NSun2) poises epidermal stem cells to differentiate. *PLoS*  
718 *Genet* 7: e1002403
- 719 Blanpain C, Fuchs E (2009) Epidermal homeostasis: a balancing act of stem cells in  
720 the skin. *Nat Rev Mol Cell Biol* 10: 207-17
- 721 Bray NL, Pimentel H, Melsted P, Pachter L (2016) Erratum: Near-optimal probabilistic  
722 RNA-seq quantification. *Nat Biotechnol* 34: 888
- 723 Calder A, Roth-Albin I, Bhatia S, Pilquill C, Lee JH, Bhatia M, Levadoux-Martin M,  
724 McNicol J, Russell J, Collins T, Draper JS (2013) Lengthened G1 phase indicates  
725 differentiation status in human embryonic stem cells. *Stem Cells Dev* 22: 279-95
- 726 Canellakis ZN, Marsh LL, Bondy PK (1989) Polyamines and their derivatives as  
727 modulators in growth and differentiation. *Yale J Biol Med* 62: 481-91
- 728 Chacon-Martinez CA, Klose M, Niemann C, Glauche I, Wickstrom SA (2017) Hair  
729 follicle stem cell cultures reveal self-organizing plasticity of stem cells and their  
730 progeny. *EMBO J* 36: 151-164
- 731 Clegg CH, Linkhart TA, Olwin BB, Hauschka SD (1987) Growth factor control of  
732 skeletal muscle differentiation: commitment to terminal differentiation occurs in G1  
733 phase and is repressed by fibroblast growth factor. *J Cell Biol* 105: 949-56
- 734 Cohen SS, Lichtenstein J (1960) Polyamines and ribosome structure. *J Biol Chem* 235:  
735 2112-6

- 736 Coleman CS, Huang H, Pegg AE (1995) Role of the carboxyl terminal MATEE  
737 sequence of spermidine/spermine N1-acetyltransferase in the activity and stabilization  
738 by the polyamine analog N1,N12-bis(ethyl)spermine. *Biochemistry* 34: 13423-30
- 739 Dever TE, Ivanov IP (2018) Roles of polyamines in translation. *J Biol Chem* 293:  
740 18719-18729
- 741 Dodt M, Roehr JT, Ahmed R, Dieterich C (2012) FLEXBAR-Flexible Barcode and  
742 Adapter Processing for Next-Generation Sequencing Platforms. *Biology (Basel)* 1:  
743 895-905
- 744 Fogel-Petrovic M, Vujcic S, Brown PJ, Haddox MK, Porter CW (1996) Effects of  
745 polyamines, polyamine analogs, and inhibitors of protein synthesis on spermidine-  
746 spermine N1-acetyltransferase gene expression. *Biochemistry* 35: 14436-44
- 747 Fredlund JO, Johansson MC, Dahlberg E, Oredsson SM (1995) Ornithine  
748 decarboxylase and S-adenosylmethionine decarboxylase expression during the cell  
749 cycle of Chinese hamster ovary cells. *Exp Cell Res* 216: 86-92
- 750 Fuchs E, Merrill BJ, Jamora C, DasGupta R (2001) At the roots of a never-ending  
751 cycle. *Dev Cell* 1: 13-25
- 752 Guo S, Zi X, Schulz VP, Cheng J, Zhong M, Koochaki SH, Megyola CM, Pan X,  
753 Heydari K, Weissman SM, Gallagher PG, Krause DS, Fan R, Lu J (2014)  
754 Nonstochastic reprogramming from a privileged somatic cell state. *Cell* 156: 649-62
- 755 Gutierrez E, Shin BS, Woolstenhulme CJ, Kim JR, Saini P, Buskirk AR, Dever TE  
756 (2013) eIF5A promotes translation of polyproline motifs. *Mol Cell* 51: 35-45
- 757 Hakkinen MR, Keinanen TA, Vepsalainen J, Khomutov AR, Alhonen L, Janne J,  
758 Auriola S (2008) Quantitative determination of underivatized polyamines by using  
759 isotope dilution RP-LC-ESI-MS/MS. *Journal of pharmaceutical and biomedical*  
760 *analysis* 48: 414-21
- 761 Hakkinen MR, Roine A, Auriola S, Tuokko A, Veskimae E, Keinanen TA, Lehtimaki T,  
762 Oksala N, Vepsalainen J (2013) Analysis of free, mono- and diacetylated polyamines  
763 from human urine by LC-MS/MS. *Journal of chromatography B, Analytical*  
764 *technologies in the biomedical and life sciences* 941: 81-9

- 765 Hershey JWB, Sonenberg N, Mathews MB (2019) Principles of Translational Control.  
766 Cold Spring Harb Perspect Biol 11
- 767 Hsu YC, Li L, Fuchs E (2014) Emerging interactions between skin stem cells and their  
768 niches. Nat Med 20: 847-56
- 769 Hsu YC, Pasolli HA, Fuchs E (2011) Dynamics between stem cells, niche, and progeny  
770 in the hair follicle. Cell 144: 92-105
- 771 Ingolia NT, Lareau LF, Weissman JS (2011) Ribosome profiling of mouse embryonic  
772 stem cells reveals the complexity and dynamics of mammalian proteomes. Cell 147:  
773 789-802
- 774 James C, Zhao TY, Rahim A, Saxena P, Muthalif NA, Uemura T, Tsuneyoshi N, Ong  
775 S, Igarashi K, Lim CY, Dunn NR, Vardy LA (2018) MINDY1 Is a Downstream Target  
776 of the Polyamines and Promotes Embryonic Stem Cell Self-Renewal. Stem Cells 36:  
777 1170-1178
- 778 Jensen UB, Yan X, Triel C, Woo SH, Christensen R, Owens DM (2008) A distinct  
779 population of clonogenic and multipotent murine follicular keratinocytes residing in the  
780 upper isthmus. J Cell Sci 121: 609-17
- 781 Kakegawa T, Guo Y, Chiba Y, Miyazaki T, Nakamura M, Hirose S, Canellakis ZN,  
782 Igarashi K (1991) Effect of acetylpolyamines on in vitro protein synthesis and on the  
783 growth of a polyamine-requiring mutant of Escherichia coli. J Biochem 109: 627-31
- 784 Kim CS, Ding X, Allmeroth K, Kolenc OI, L'Hoest N, Chacon-Martinez CA, Edlich-Muth  
785 C, Giavalisco P, Quinn KP, Denzel MS, Eming SA, Wickstrom SA (2019) An mTORC2-  
786 dependent switch to glutamine metabolism controls stem cell fate reversibility and  
787 long-term maintenance in the hair follicle. Manuscript submitted for publication
- 788 Kristensen AR, Gsponer J, Foster LJ (2013) Protein synthesis rate is the predominant  
789 regulator of protein expression during differentiation. Mol Syst Biol 9: 689
- 790 Landau G, Bercovich Z, Park MH, Kahana C (2010) The role of polyamines in  
791 supporting growth of mammalian cells is mediated through their requirement for  
792 translation initiation and elongation. J Biol Chem 285: 12474-81

- 793 Li A, Simmons PJ, Kaur P (1998) Identification and isolation of candidate human  
794 keratinocyte stem cells based on cell surface phenotype. *Proc Natl Acad Sci U S A* 95:  
795 3902-7
- 796 Liu L, Michowski W, Inuzuka H, Shimizu K, Nihira NT, Chick JM, Li N, Geng Y, Meng  
797 AY, Ordureau A, Kolodziejczyk A, Ligon KL, Bronson RT, Polyak K, Harper JW, Gygi  
798 SP, Wei W, Sicinski P (2017) G1 cyclins link proliferation, pluripotency and  
799 differentiation of embryonic stem cells. *Nat Cell Biol* 19: 177-188
- 800 Love MI, Huber W, Anders S (2014) Moderated estimation of fold change and  
801 dispersion for RNA-seq data with DESeq2. *Genome Biol* 15: 550
- 802 Lu R, Markowitz F, Unwin RD, Leek JT, Airoidi EM, MacArthur BD, Lachmann A,  
803 Rozov R, Ma'ayan A, Boyer LA, Troyanskaya OG, Whetton AD, Lemischka IR (2009)  
804 Systems-level dynamic analyses of fate change in murine embryonic stem cells.  
805 *Nature* 462: 358-62
- 806 Metcalf BW, Bey P, Danzin C, Jung MJ, Casara P, Vevert JP (1978) Catalytic  
807 irreversible inhibition of mammalian ornithine decarboxylase (E.C.4.1.1.17) by  
808 substrate and product analogs. *Journal of the American Chemical Society* 100: 2551-  
809 2553
- 810 Nancarrow MJ, Nesci A, Hynd PI, Powell BC (1999) Dynamic expression of ornithine  
811 decarboxylase in hair growth. *Mech Dev* 84: 161-4
- 812 Noga MJ, Dane A, Shi S, Attali A, van Aken H, Suidgeest E, Tuinstra T, Muilwijk B,  
813 Coulier L, Luider T, Reijmers TH, Vreeken RJ, Hankemeier T (2012) Metabolomics of  
814 cerebrospinal fluid reveals changes in the central nervous system metabolism in a rat  
815 model of multiple sclerosis. *Metabolomics : Official journal of the Metabolomic Society*  
816 8: 253-263
- 817 Odenlund M, Holmqvist B, Baldetorp B, Hellstrand P, Nilsson BO (2009) Polyamine  
818 synthesis inhibition induces S phase cell cycle arrest in vascular smooth muscle cells.  
819 *Amino Acids* 36: 273-82
- 820 Park MH, Cooper HL, Folk JE (1981) Identification of hypusine, an unusual amino acid,  
821 in a protein from human lymphocytes and of spermidine as its biosynthetic precursor.  
822 *Proc Natl Acad Sci U S A* 78: 2869-73

- 823 Parry L, Balana Fouce R, Pegg AE (1995) Post-transcriptional regulation of the content  
824 of spermidine/spermine N1-acetyltransferase by N1N12-bis(ethyl)spermine. *Biochem*  
825 *J* 305 ( Pt 2): 451-8
- 826 Pegg AE (2016) Functions of Polyamines in Mammals. *J Biol Chem* 291: 14904-12
- 827 Pieragostino D, D'Alessandro M, di Iorio M, Rossi C, Zucchelli M, Urbani A, Di Iorio C,  
828 Lugaresi A, Sacchetta P, Del Boccio P (2015) An integrated metabolomics approach  
829 for the research of new cerebrospinal fluid biomarkers of multiple sclerosis. *Molecular*  
830 *bioSystems* 11: 1563-72
- 831 Quinlan AR, Hall IM (2010) BEDTools: a flexible suite of utilities for comparing genomic  
832 features. *Bioinformatics* 26: 841-2
- 833 Ray RM, Zimmerman BJ, McCormack SA, Patel TB, Johnson LR (1999) Polyamine  
834 depletion arrests cell cycle and induces inhibitors p21(Waf1/Cip1), p27(Kip1), and p53  
835 in IEC-6 cells. *Am J Physiol* 276: C684-91
- 836 Roux PP, Topisirovic I (2018) Signaling Pathways Involved in the Regulation of mRNA  
837 Translation. *Mol Cell Biol* 38
- 838 Ruiz S, Panopoulos AD, Herrerias A, Bissig KD, Lutz M, Berggren WT, Verma IM,  
839 Izpisua Belmonte JC (2011) A high proliferation rate is required for cell reprogramming  
840 and maintenance of human embryonic stem cell identity. *Curr Biol* 21: 45-52
- 841 Saini P, Eyler DE, Green R, Dever TE (2009) Hypusine-containing protein eIF5A  
842 promotes translation elongation. *Nature* 459: 118-21
- 843 Sampath P, Pritchard DK, Pabon L, Reinecke H, Schwartz SM, Morris DR, Murry CE  
844 (2008) A hierarchical network controls protein translation during murine embryonic  
845 stem cell self-renewal and differentiation. *Cell Stem Cell* 2: 448-60
- 846 Sanchez-Lopez J, Camanes G, Flors V, Vicent C, Pastor V, Vicedo B, Cerezo M,  
847 Garcia-Agustin P (2009) Underivatized polyamine analysis in plant samples by ion pair  
848 LC coupled with electrospray tandem mass spectrometry. *Plant physiology and*  
849 *biochemistry* : PPB 47: 592-8
- 850 Schmidt EK, Clavarino G, Ceppi M, Pierre P (2009) SUnSET, a nonradioactive method  
851 to monitor protein synthesis. *Nat Methods* 6: 275-7

- 852 Seiler N, Dezeure F (1990) Polyamine transport in mammalian cells. *Int J Biochem* 22:  
853 211-8
- 854 Sela Y, Molotski N, Golan S, Itskovitz-Eldor J, Soen Y (2012) Human embryonic stem  
855 cells exhibit increased propensity to differentiate during the G1 phase prior to  
856 phosphorylation of retinoblastoma protein. *Stem Cells* 30: 1097-108
- 857 Signer RA, Magee JA, Salic A, Morrison SJ (2014) Haematopoietic stem cells require  
858 a highly regulated protein synthesis rate. *Nature* 509: 49-54
- 859 Soler AP, Gilliard G, Megosh LC, O'Brien TG (1996) Modulation of murine hair follicle  
860 function by alterations in ornithine decarboxylase activity. *J Invest Dermatol* 106: 1108-  
861 13
- 862 Sonnenberg A, Calafat J, Janssen H, Daams H, van der Raaij-Helmer LM, Falcioni R,  
863 Kennel SJ, Aplin JD, Baker J, Loizidou M, et al. (1991) Integrin alpha 6/beta 4 complex  
864 is located in hemidesmosomes, suggesting a major role in epidermal cell-basement  
865 membrane adhesion. *J Cell Biol* 113: 907-17
- 866 Sunkara PS, Ramakrishna S, Nishioka K, Rao PN (1981) The relationship between  
867 levels and rates of synthesis of polyamines during mammalian cell cycle. *Life Sci* 28:  
868 1497-506
- 869 Tahmasebi S, Amiri M, Sonenberg N (2018a) Translational Control in Stem Cells. *Front*  
870 *Genet* 9: 709
- 871 Tahmasebi S, Khoutorsky A, Mathews MB, Sonenberg N (2018b) Translation  
872 deregulation in human disease. *Nat Rev Mol Cell Biol* 19: 791-807
- 873 Trempus CS, Morris RJ, Bortner CD, Cotsarelis G, Faircloth RS, Reece JM, Tennant  
874 RW (2003) Enrichment for living murine keratinocytes from the hair follicle bulge with  
875 the cell surface marker CD34. *J Invest Dermatol* 120: 501-11
- 876 Tsai YH, Lin KL, Huang YP, Hsu YC, Chen CH, Chen Y, Sie MH, Wang GJ, Lee MJ  
877 (2015) Suppression of ornithine decarboxylase promotes osteogenic differentiation of  
878 human bone marrow-derived mesenchymal stem cells. *FEBS Lett* 589: 2058-65
- 879 Uimari A, Keinänen TA, Karppinen A, Woster P, Uimari P, Janne J, Alhonen L (2009)  
880 Spermine analogue-regulated expression of spermidine/spermine N1-

- 881 acetyltransferase and its effects on depletion of intracellular polyamine pools in mouse  
882 fetal fibroblasts. *Biochem J* 422: 101-9
- 883 Wallace HM, Fraser AV, Hughes A (2003) A perspective of polyamine metabolism.  
884 *Biochem J* 376: 1-14
- 885 Yamashita T, Nishimura K, Saiki R, Okudaira H, Tome M, Higashi K, Nakamura M,  
886 Terui Y, Fujiwara K, Kashiwagi K, Igarashi K (2013) Role of polyamines at the G1/S  
887 boundary and G2/M phase of the cell cycle. *Int J Biochem Cell Biol* 45: 1042-50
- 888 Zhang D, Zhao T, Ang HS, Chong P, Saiki R, Igarashi K, Yang H, Vardy LA (2012)  
889 AMD1 is essential for ESC self-renewal and is translationally down-regulated on  
890 differentiation to neural precursor cells. *Genes Dev* 26: 461-73
- 891 Zhao T, Goh KJ, Ng HH, Vardy LA (2012) A role for polyamine regulators in ESC self-  
892 renewal. *Cell Cycle* 11: 4517-23
- 893 Zhou Y, Zhou B, Pache L, Chang M, Khodabakhshi AH, Tanaseichuk O, Benner C,  
894 Chanda SK (2019) Metascape provides a biologist-oriented resource for the analysis  
895 of systems-level datasets. *Nat Commun* 10: 1523
- 896 Zismanov V, Chichkov V, Colangelo V, Jamet S, Wang S, Syme A, Koromilas AE, Crist  
897 C (2016) Phosphorylation of eIF2alpha Is a Translational Control Mechanism  
898 Regulating Muscle Stem Cell Quiescence and Self-Renewal. *Cell Stem Cell* 18: 79-90  
899

900 **Supplemental Figures**

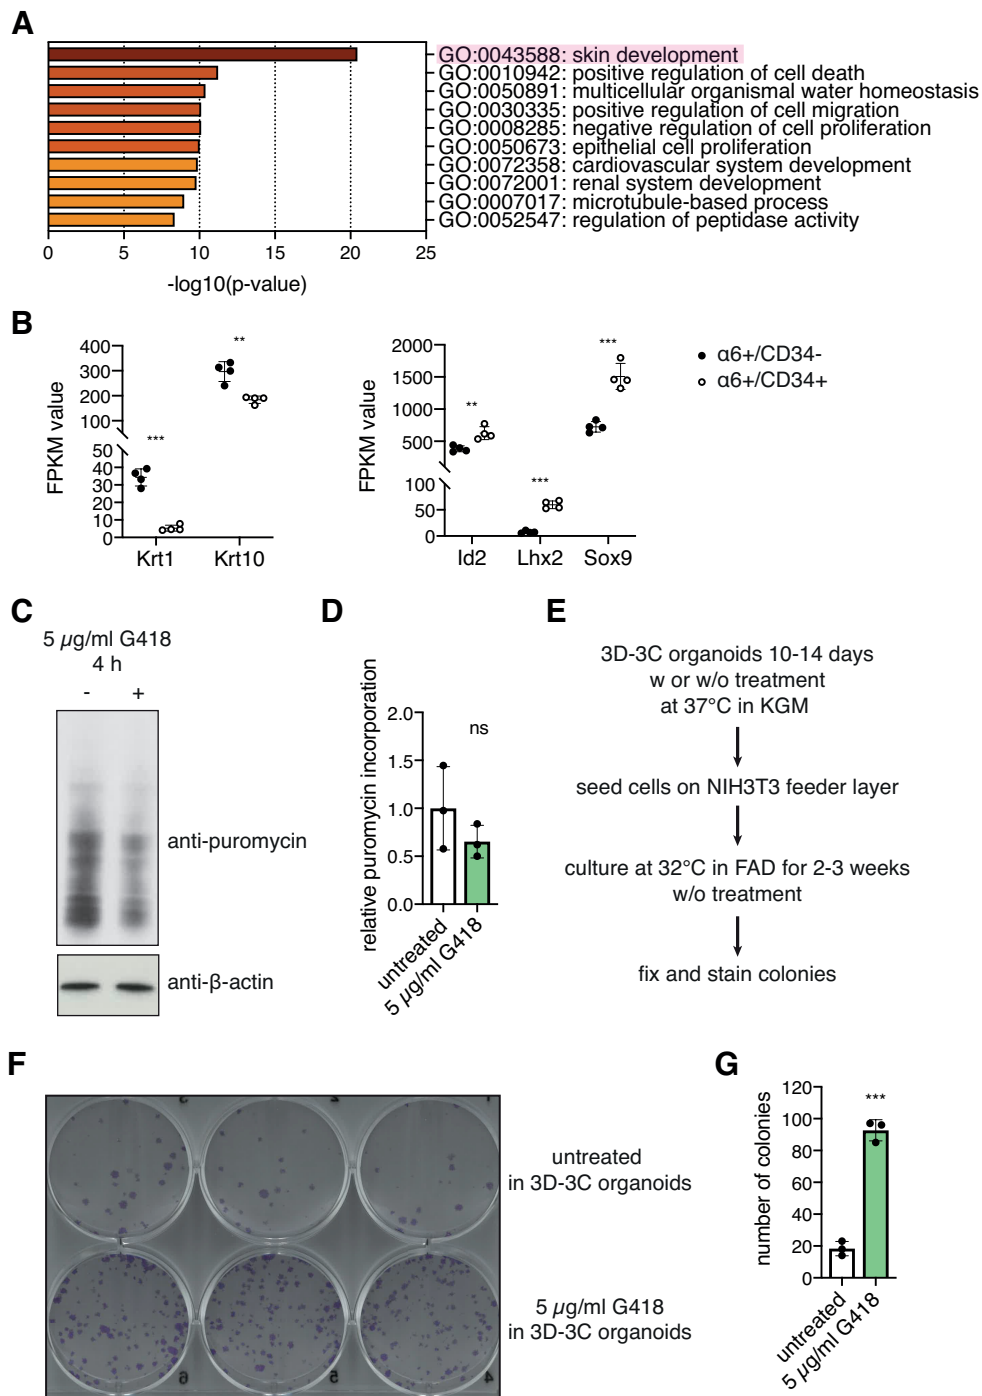

901

902 **Figure S1: RNA-Sequencing confirms cell identity, which can be influenced by G418 treatment**  
 903 **in the 3D-3C organoids.** (A) GO term analysis of differentially expressed genes ( $p$ -value  $< 0.05$ ,  
 904  $\log_2FC > \pm 0.5$ ) from RNA-Seq experiment comparing  $\alpha 6^+ / CD34^-$  progenitor cells with  $\alpha 6^+ / CD34^+$  stem  
 905 cells (biological process, metascape.org). (B) FPKM values of differentiation (K1, K10) and stem cell  
 906 marker genes (Id2, Lhx2, Sox9). Mean  $\pm$  SD ( $n=4$ ). \*\*\*  $p < 0.001$ ; \*\*  $p < 0.01$  (t test). (C) Representative  
 907 Western blot analysis after puromycin incorporation in 3D-3C cultured cells. G418 treatment was  
 908 performed for the last 4 h of the culture. (D) Quantification of the Western blot in (C). Mean  $\pm$  SD ( $n=3$ ).  
 909 ns: not significant (t test). (E) Schematic representation of the workflow for colony formation assay after  
 910 3D-3C organoid culture. (F) Representative image of tissue culture plate after colony formation assay  
 911 using cells with or without G418 treatment in 3D-3C organoids ( $n=3$ ). (G) Quantification of colony  
 912 number in (F). Mean  $\pm$  SD ( $n=3$ ). \*\*\*  $p < 0.001$  (t test).



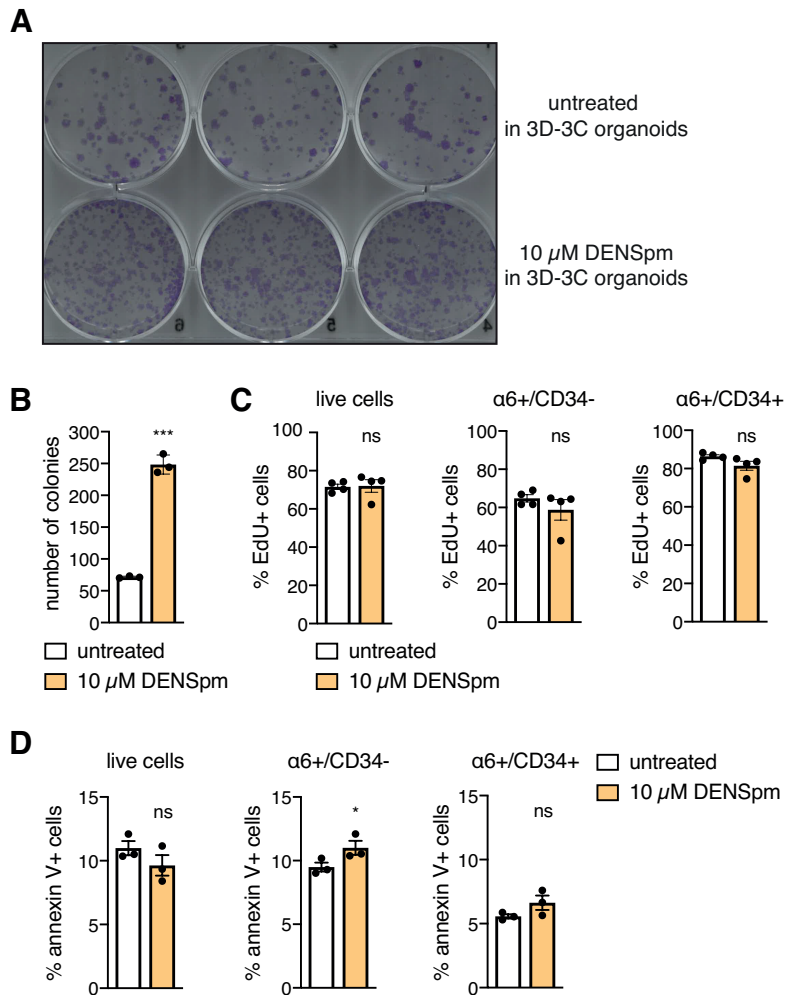

913

914 **Figure S2: DENSpM treatment increases stem cell potency without major effects on proliferation**  
915 **or apoptosis.** (A) Representative image of tissue culture plate after colony formation assay using cells  
916 with or without DENSpM treatment in 3D-3C organoids (n=2). (B) Quantification of colony number in  
917 (A). Mean  $\pm$  SD (n=3). \*\*\*  $p < 0.001$  (t test). (C) Ratio of EdU+ cells with or without DENSpM treatment.  
918 EdU was incorporated for 24 h. Mean  $\pm$  SEM (n=4). ns: not significant (t test). (D) Ratio of annexin V+  
919 cells with or without DENSpM treatment. Mean  $\pm$  SEM (n=4). \*  $p < 0.05$ ; ns: not significant (t test).

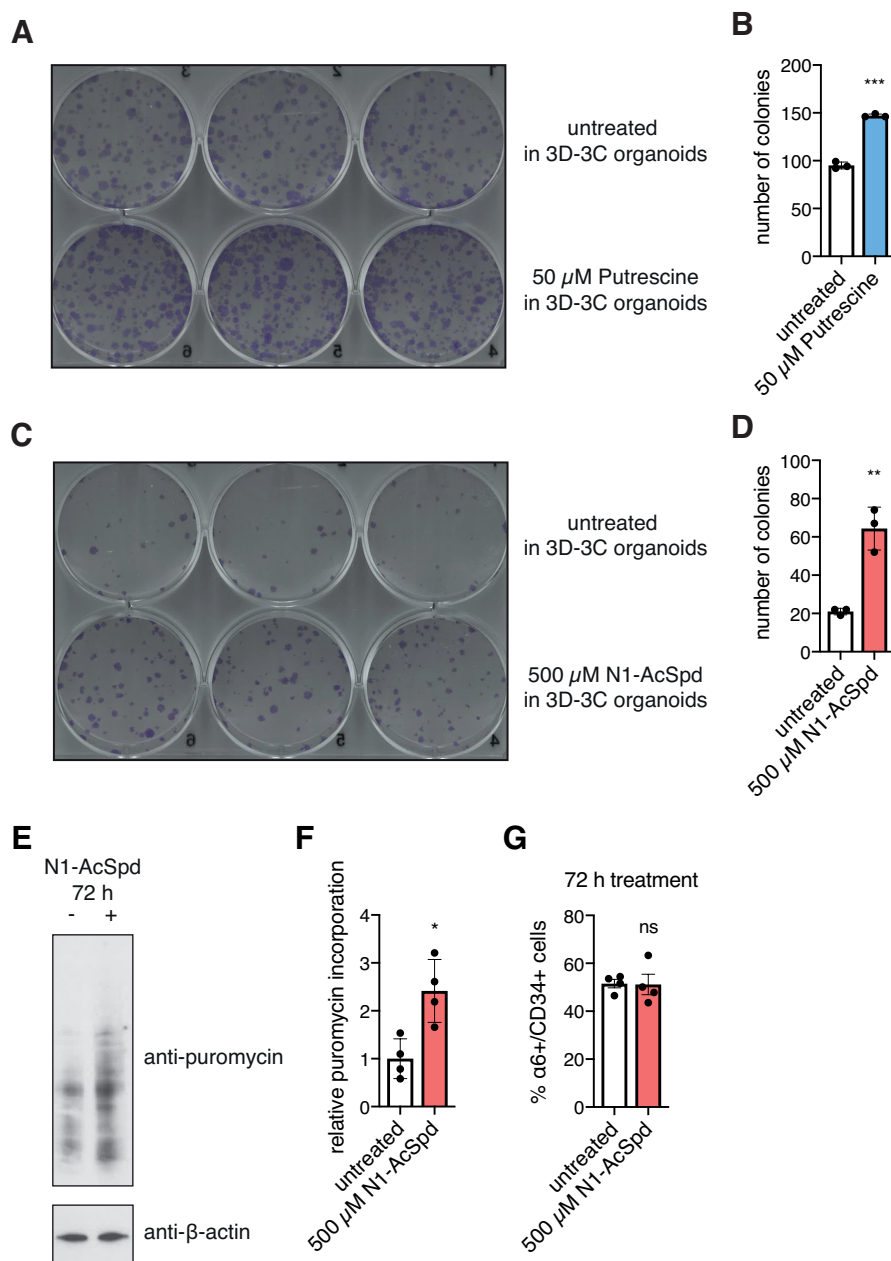

920

921 **Figure S3: N1-acetylspermidine treatment increases stem cell potency without reducing**  
 922 **translation.** (A) Representative image of tissue culture plate after colony formation assay using cells  
 923 with or without putrescine treatment in 3D-3C organoids (n=2). (B) Quantification of colony number of  
 924 plate in (A). Mean  $\pm$  SD (n=3). (C) Representative image of tissue culture plate after colony formation  
 925 assay using cells with or without N1-AcSpd treatment in 3D-3C organoids (n=3). (D) Quantification of  
 926 colony number of plate in (C). Mean  $\pm$  SD (n=3). (E) Representative Western blot analysis after  
 927 puromycin incorporation in 3D-3C cultured cells. N1-AcSpd treatment (500  $\mu$ M) was performed for the  
 928 last 72 h of the culture. (F) Quantification of the Western blot in (E). Mean  $\pm$  SD (n=4). (G) Ratio of  
 929  $\alpha$ 6+/CD34+ cells after two weeks of 3D-3C culture with or without N1-AcSpd treatment for the last 72 h.  
 930 Mean  $\pm$  SEM (n=4). (A-G) Statistical significance was calculated by t test. \*\*\* p<0.001, \*\* p<0.01,  
 931 \* p<0.05, ns: not significant.



933 **Figure S4: Schematic representation of the workflow of RNA sequencing analysis, which**  
934 **revealed maintained cell identity upon N1-acetylspermidine treatment.** (A) Schematic  
935 representation of the workflow for RNA-seq sample collection. (B) Schematic representation of the  
936 bioinformatic workflow.  $\alpha 6^{+}/CD34^{-}$  cells and  $\alpha 6^{+}/CD34^{+}$  cells were compared for untreated and treated  
937 conditions. Genes were filtered ( $p$ -value  $< 0.05$ ,  $\log_2FC > \pm 0.5$ ) and the resulting lists were used for  
938 further analysis. Control (CTR) is shown in gray, N1-AcSpd is depicted in red. (C) Venn diagram of the  
939 two groups from (B). CTR is shown in gray, N1-AcSpd is depicted in red. (D) Venn diagram of  
940 differentially expressed genes upon N1-AcSpd treatment (red) and genes covered by GO term cell  
941 division (brown). (E) Ratio of EdU+ cells in  $\alpha 6^{+}/CD34^{-}$  progenitors and  $\alpha 6^{+}/CD34^{+}$  HFSCs. Mean  $\pm$   
942 SEM ( $n=4$ ). \*  $p < 0.05$  (t test). (F) GO term analysis of differentially expressed genes between cell types  
943 ( $p$ -value  $< 0.05$ ,  $\log_2FC > \pm 0.5$ ) from RNA-seq experiment common in untreated and treated cells  
944 (overlap shown in (C), biological process, metascape.org). (G) Heat map showing differentially  
945 expressed genes with a  $p$ -value  $\leq 0.05$  ( $\alpha 6^{+}/CD34^{-}$  vs.  $\alpha 6^{+}/CD34^{+}$ ; treated or untreated). (H) GO term  
946 analysis of differentially expressed genes between cell types ( $p$ -value  $< 0.05$ ,  $\log_2FC > \pm 0.5$ ) from RNA-  
947 seq experiment only in untreated cells (gray in (C), biological process, metascape.org).
